1 **Pneumococcal attachment to epithelial cells is enhanced by the secreted peptide VP1**  
2 **via its control of hyaluronic acid processing**

3

4 Rolando A. Cuevas<sup>1</sup>, Elnaz Ebrahimi<sup>1</sup>, Ozcan Gazioglu<sup>2</sup>, Hasan Yesilkaya<sup>2</sup>, N. Luisa Hiller<sup>1\*</sup>.

5

6 1. Department of Biological Sciences, Carnegie Mellon University, Pittsburgh, PA 15213.

7 2. Department of Respiratory Sciences, University of Leicester, Leicester, United Kingdom.

8 \* Address correspondence to N. Luisa Hiller, [lhiller@andrew.cmu.edu](mailto:lhiller@andrew.cmu.edu)

## 9 **ABSTRACT**

10       The Gram-positive bacterium *Streptococcus pneumoniae* (pneumococcus) is an  
11 important human pathogen. It can either asymptotically colonize the nasopharynx or spread  
12 to other tissues to cause mild to severe diseases. Nasopharyngeal colonization is a  
13 prerequisite for all pneumococcal diseases. We describe a molecular pathway utilized by  
14 pneumococcus to adhere to host cells and promote colonization. We demonstrate that the  
15 secreted peptide VP1 enhances pneumococcal attachment to epithelial cells. Transcriptional  
16 studies reveal that VP1 triggers the expression of operons involved in the transport and  
17 metabolism of hyaluronic acid (HA), a glycosaminoglycan present in the host extracellular  
18 matrix. Genetic experiments in the pneumococcus reveal that HA processing locus (HAL)  
19 promotes attachment. Further, overexpression of HAL genes in the  $\Delta vp1$  background, reveal  
20 that the influence of VP1 on attachment is mediated via its effect on HA. In addition, VP1 also  
21 enhances degradation of the HA polymer, in a process that depends on the HAL genes. siRNA  
22 experiments to knockdown host HA synthesis support this conclusion. In these knockdown  
23 cells, attachment of wild-type pneumococci is decreased, and VP1 and HAL genes no longer  
24 contribute to the attachment. Finally, experiments in a murine model of colonization reveal that  
25 VP1 and HAL genes are significant contributors to colonization. Our working model, which  
26 combines our previous and current work, is that changes in nutrient availability that influence  
27 CodY and Rgg144 lead to changes in the levels of VP1. In turn, VP1 controls the expression of  
28 a genomic region involved in the transport and metabolism of HA, and these HAL genes  
29 promote adherence in an HA-dependent manner. VP1 is encoded by a core gene, which is  
30 highly induced *in vivo* and is a major contributor to host adhesion, biofilm development,  
31 colonization, and virulence. In conclusion, the VP1 peptide plays a central role in a pathway

32 that connects nutrient availability, population-level signaling, adhesion, biofilm formation,  
33 colonization, and virulence.

## 34 AUTHOR SUMMARY

35 *Streptococcus pneumoniae* (the pneumococcus) is a major human pathogen. This  
36 bacterium asymptotically colonizes the human upper respiratory tract from where it can  
37 disseminate to other tissues causing mild to severe disease. Colonization is a prerequisite for  
38 dissemination and disease, such that the molecules that control colonization are high-value  
39 candidates for therapeutic interventions. Pneumococcal colonization is a population-level  
40 response, which requires attachment to host cells and biofilm development. VP1 is a signaling  
41 peptide, highly induced in the presence of host cells and *in vivo*, promotes biofilm  
42 development, and serves as a potent virulence determinant. In this study, we build on the  
43 molecular mechanism of VP1 function to reveal novel bacterial and host molecules that  
44 enhance adherence and colonization. Our findings suggest that host hyaluronic acid serves as  
45 an anchor for pneumococcal cells, and that genes involved in the transport and metabolism of  
46 HA promote adherence. These genes are triggered by VP1, which in turn, is controlled by  
47 regulators that respond to nutrient status of the host. Finally, our results are strongly supported  
48 by studies in a murine model of colonization. We propose that VP1 serves as a marker for  
49 colonization and a target for drug design.

## 50 INTRODUCTION

51 The Gram-positive bacterium *Streptococcus pneumoniae* (also known as the  
52 pneumococcus) is an important human pathogen. A recent global study on lower respiratory  
53 infections determined that the pneumococcus contributed to morbidity more than all other  
54 etiologies combined: it was responsible for an estimated 1.18 million deaths (1,2). This  
55 pathogen can either asymptotically colonize the nasopharynx or spread to other tissues to  
56 cause mild to severe diseases. It can spread to the middle ear and sinus, leading to otitis  
57 media or sinus infections, and the lungs causing pneumonia (3). It can also disseminate into  
58 the bloodstream, brain or heart causing sepsis, meningitis, or heart disease, respectively (4,5).  
59 It is well established that nasopharyngeal colonization is a prerequisite for all pneumococcal  
60 diseases. In this study, we explore the mechanisms of colonization and virulence.

61  
62 Pneumococcus secretes many small peptides, which influence colonization, virulence,  
63 and adaptation via effects on competence, intra-species competition, and biofilm development  
64 (6–18). The **Virulence Peptide 1 (VP1)** is a member of a family of peptides with a conserved N-  
65 terminal sequence characterized by a double glycine motif, which directs its export into the  
66 extracellular milieu via ABC transporters (7,19). The *vp1* gene is widely distributed across  
67 pneumococcal strains, as well as encoded in related streptococcal species. The gene  
68 encoding VP1 is a virulence determinant and is highly upregulated in the presence of host cells  
69 where it promotes biofilm development (7,20). Pneumococcal biofilms have been documented  
70 in the nasopharynx, the middle ear, and the sinus (21–24). This mode of growth enhances  
71 pneumococcal dissemination and pathogenesis (25,26). Further, biofilms promote  
72 pneumococcal colonization in multiple ways: they facilitate immune evasion, increase  
73 resistance to antimicrobials, and provide a platform for DNA acquisition (27–29,29–32). In

74 summary, VP1 is a secreted peptide, induced in the presence of human cells, that promotes  
75 biofilm development and virulence.

76

77 Glycosaminoglycans (GAGs) are major components of the extracellular matrix. GAGs  
78 are acidic linear polysaccharides with a repeated disaccharide unit. The disaccharides consist  
79 of an amino sugar (*N*-acetylglucosamine or *N*-acetylgalactosamine) and a uronic acid  
80 (glucuronic acid or iduronic acid) or galactose. These polymers are classified into groups  
81 based on the nature of the disaccharides, the mode of glycoside bond, and the sulfation levels  
82 (33). The main groups are heparin and heparan sulfates (HS), chondroitin and dermatan  
83 sulfate (CS), keratan sulfate, and finally hyaluronic acid (HA) (also known as hyaluronate or  
84 hyaluronan) (34). Their molecular weights range from 15 to over 100 kDa, and their synthesis  
85 takes place in the Golgi apparatus, with the exception of HA, which is synthesized at the  
86 membrane (35). GAGs participate in numerous biological processes of the host and the  
87 bacteria. In the host, they influence cell adhesion and growth, cell proliferation and  
88 differentiation, and tissue formation (for comprehensive reviews, please see Iozzo and  
89 Schaefer, 2015; Pomin and Mulloy, 2018; Taylor and Gallo, 2006). In the context of microbial  
90 infections, they serve as sources of nutrients and modulators of the immune response (38–41).  
91 In addition, many bacteria utilize GAGs to adhere to host cells (42). This includes the  
92 pneumococcus, where treatment of lung cells to decrease HS and CS levels reduces  
93 pneumococcal adherence (43). In this manner, GAGs are critical components of the bacterial  
94 environment during biofilm formation and host interactions.

95

96 HA consists of disaccharides of *N*-acetyl-D-glucosamine (GlcNAc) and D-glucuronic  
97 acid (GlcUA). This GAG is present on the apical surface of human bronchial epithelial cells and  
98 in the airway mucosa (44,45). It is also abundant in the synovial fluid, skin, umbilical cord, and

99 vitreous body and is the only non-sulfated glycosaminoglycan in the lung (46–48). This  
100 unbranched polysaccharide provides mechanical support, activates immunity, and modulates  
101 cell proliferation, migration, and intracellular signaling within the host (49–51). Many  
102 streptococcal genomes encode multiple operons for HA transport and metabolism. In the  
103 pneumococcus, it has been shown that HA processing and internalization is carried out by a  
104 unique set of enzymes including a hyaluronidase, a transporter system, and a hydrolase  
105 (52,53). The current model suggests that HA is digested into disaccharides by a hyaluronidase  
106 (*hysA* or *hyla*), predicted to be covalently linked to the cell wall via an LPxTG motif. The  
107 disaccharides are imported into the bacteria and phosphorylated via a phosphoenolpyruvate-  
108 dependent phosphotransferase system (PTS) system. The PTS system is composed of  
109 general and substrate-specific components. Enzyme I (EI) and the histidine-containing  
110 phosphocarrier protein (HPr) are cytoplasmic subunits, shared by multiple PTS systems. In  
111 contrast, Enzyme II (EII) provides specificity to the PTS via substrate recognition. EII has four  
112 enzymes: EIIA and EIIB are cytosolic, and EIIC and EIID are the transmembrane components  
113 and form a pore. During internalization via the PTS, the HA disaccharides are phosphorylated.  
114 These disaccharides are processed by an unsaturated glucuronyl hydrolase (*ugl*) into the  
115 monosaccharide components. Finally, the GlcUA can be further processed into glyceraldehyde  
116 3-phosphate and pyruvate by a set of four genes (the isomerase *kduL*, the reductase *kduD*,  
117 the kinase *kdgK*, and the aldolase *kdgA*). Operons for the hydrolase, the PTS-EII system, and  
118 the GlcUA metabolism enzymes are all adjacent in the genome, and under the control of  
119 RegR, a negative regulator located immediately downstream (54). Note that the unsaturated  
120 glucuronyl hydrolase not only cleaves HA into GlcNAc and GlcUA, it can also cleave  
121 chondroitin sulfate into their component monosaccharides (53,55). The HA pathway has been  
122 shown to influence pneumococcal biology. Specifically, *hysA* and the genes in the PTS-EII-

123 encoding operon (EIIB, EIIC, EIID, and *ugl*), are required for pneumococcal growth on human  
124 HA, and contribute to pneumococcal biofilm formation and virulence (54,56,57).

125

126 In this study, we show that VP1 promotes pneumococcal adherence via activation of HA  
127 transport and metabolism. Our experiments in a murine model of pneumococcal carriage  
128 demonstrate that both VP1 and HA processing promote colonization. We propose a model  
129 where the nutritional status of the host induces expression of the pneumococcal secreted  
130 peptide VP1, via CodY and Rgg144 (7,18,58). Signaling by VP1 triggers HA metabolism in the  
131 bacteria, which in turn, regulates attachment to host cells and colonization in the upper  
132 airways.



## 133 RESULTS

### 134 ***vp1* enhances pneumococcal attachment to epithelial cells**

135 We have previously shown that *vp1* plays a role in biofilm development (7). Thus, we  
136 investigated whether *vp1* influences attachment to epithelial cells, an early step in biofilm  
137 formation. For these studies, we utilized strain PN4595-T23, a representative of the drug-  
138 resistant and pandemic PMEN1 pneumococcal lineage (59–62). To show that the results  
139 extend beyond one lineage, we also employed TIGR4, a clinical isolate frequently used as a  
140 model strain (63). For host cells, we utilized the human lung epithelial cells line A549. These  
141 cells have been extensively used to study pneumococcal behavior (20,64,65). Early works  
142 demonstrated that A549 cells display features of type II alveolar pneumocytes: they are  
143 capable of surfactant production (66–68), they produce cell surface-associated MUC1 and  
144 secrete MUC5AC mucin in air-liquid cultures (69,70), and they produce HA. Further, our  
145 experiments on adhesion are extended to NIH-3T3 fibroblasts as they express HA and  
146 chinchilla middle ear epithelial cells (CMEE) as these primary cells were used in the original  
147 characterization of VP1 function (7,71).

148

149 We established that the wild-type strain displays strong attachment to A549 cells after  
150 one hour of exposure (Fig S1A). Thus, we used this time point to compare adhesion between  
151 wild-type, *vp1* deletion mutant ( $\Delta vp1$ ) and *vp1* complement strains ( $\Delta vp1:vp1$ ) by using spot  
152 plating assays and enumerating the total bound bacteria on TSA plates. The  $\Delta vp1$  displays a  
153 reduction in attachment compared to the wild-type cells. Furthermore, the wild-type phenotype  
154 is rescued in a *vp1* complement strain ( $\Delta vp1:vp1$ ) (Fig 1A). These data suggest that VP1  
155 promotes attachment to the lung epithelia. This role for the *vp1* gene product is not specific to  
156 A549 cells, as *vp1* also promotes adherence to chinchilla middle ear epithelial cells (CMEE)

157 and NIH-3T3 fibroblasts (Figs S1B and S1C). Similarly, these results extend beyond the  
158 PMEN1 lineage, deletion of the operon encoding *vp1* (*vpo*) in a TIGR4 background also  
159 displays decreased attachment relative to the wild-type strain and this phenotype is restored to  
160 wild-type levels in a *vpo* complement strain (Fig S1D). Adherent bacteria were visualized by  
161 fluorescence microscopy of A549 cells inoculated with PMEN1 cells (Fig 1B). The confocal  
162 orthogonal view shows localization at the surface of A549 cells (**Fig S1E**). Finally, the  
163 difference in attachment is not the result of variation in growth rate between strains, as growth  
164 in DMEM media is the same for wild-type,  $\Delta vp1$ , and  $\Delta vp1:vp1$  strains, as previously reported  
165 (7). We conclude that *vp1* promotes pneumococcal attachment to mammalian epithelial cells.

166

### 167 **The *vp1* product positively regulates expression of HA transport and metabolism genes.**

168 The VP1 pro-peptide possesses a double glycine motif common to secreted peptides  
169 that bind surface-bound histidine kinase receptors from pneumococcal two-component signal  
170 transduction system (72). Further, synthetic VP1 binds to the pneumococcal surface (7). Thus,  
171 we hypothesized that VP1 signals to producing and neighboring cells and induces expression  
172 of genes that participate in the attachment.

173

174 To test this hypothesis, we compared the genome-wide expression of the wild-type  
175 PN4595-T23 strain and the isogenic  $\Delta vp1$  mutant using the pangenome pneumococcal array  
176 (13) (Fig 2A) Strains were grown in chemically defined media (CDM) supplemented with  
177 glucose (CDM-Glu), as *vp1* expression is induced in this media relative to rich media (7). In  
178 support of the hypothesis, twenty-eight genes displayed a 3-fold difference in expression  
179 between the wild-type strain and the  $\Delta vp1$  strain (Fig 2A and S1 Table). Many of these genes

180 are organized into three genomic regions (Fig 2B). Microarray results were validated by qRT-  
181 PCR for a subset of genes (S2 Table). Taken together, we observed a significant number of  
182 genes with transcription levels that respond to *vp1*.

183

184 Our analysis shows that two neighboring operons display higher expression in the wild-  
185 type strain relative to the  $\Delta vp1$ ; these operons have been previously implicated in the  
186 processing of HA (53). Together, these two operons encode eleven genes that displayed an  
187 average 4.28-fold decrease in expression in the  $\Delta vp1$  relative to the wild-type strain (Figs 2B  
188 and 3A). One operon is on the positive strand and encodes seven genes. In this study, for  
189 simplicity, we refer to this as the PTS-HAL operon as it encodes the four EIIABCD enzymes  
190 that form the PTS importer (Fig 3A). This importer is required for phosphorylation and  
191 internalization of HA (EII genes are: SPN23F\_02950, and SPN23F\_02970 to SPN23F\_02990).  
192 The operon also contains the *ugt* gene that encodes an unsaturated glucuronyl hydrolase  
193 (SPN23F\_02960), the preprotein translocase YajC that is a subunit of the bacterial holo-  
194 translocon (SPN23F\_03000) (73), and finally a predicted heparinase (SPN23F\_3010). Our  
195 analysis with Phyre2 (74), indicates that the heparinase is a glycosidase that belongs to the  
196 superfamily of heparinases type II/III; member of this family bind and degrade heparin and  
197 heparin sulfate (75). It is noteworthy, that 60 base-pairs downstream of the end of *hep*, is the  
198 negative regulator RegR (SPN23F\_3020) (76). Analyses of the region upstream of RegR with  
199 the promoter identification programs BDPG and BPRM suggests the presence of an active  
200 promoter with the -35 within the *hep* sequence (77,78). The second operon regulated by VP1  
201 is immediately upstream of the PTS-HAL operon on the negative strand, it encodes four  
202 enzymes predicted to metabolize glucuronic acid into glyceraldehyde-3 phosphate and

203 pyruvate (SPN23F\_02910 to SPN23F\_02940). These transcriptional findings suggest that *vp1*  
204 triggers the expression of genes implicated in the transport and metabolism of HA.

205

206 **The *vp1* product promotes degradation of the HA polymer via its control of the HA**  
207 **processing and transport operon.**

208         Once we established that VP1 stimulates expression of multiple genes involved in HA  
209 metabolism, we tested whether VP1 could influence the processing of the HA polymer. To this  
210 end, we measured the hyaluronidase activity in pellets and supernatants of the PN4595-T23  
211 strain carrying deletions of *vp1*, PTS-HAL, and various genes involved in HA processing (Fig  
212 3B). In this assay, bacterial pellets or supernatants were mixed with the HA polymer,  
213 degradation of HA was measured as a change in optical density at OD<sub>400</sub> and reported as  
214 hyaluronidase concentration (76). As controls, we employed the  $\Delta hysA$ , as this gene encodes  
215 for a hyaluronidase and its deletion should result in reduced hyaluronidase relative to the wild-  
216 type strain (53,79). As predicted, this strain displayed 2.6-fold lower hyaluronidase levels ( $p <$   
217 0.0001 relative to the wild-type strain). We also employed a  $\Delta regR$  mutant, as this gene  
218 encodes for a repressor of *hysA* and its deletion should lead to increased hyaluronidase  
219 activity (54). The  $\Delta regR$  strain exhibited elevated hyaluronidase activity ( $p = 0.0006$ ). The  $\Delta vp1$   
220 strain displayed 1.7-fold lower hyaluronidase compared to the wild-type strain ( $p < 0.0001$ ).  
221 This defect was rescued in the  $\Delta vp1:vp1$  ( $p < 0.0001$  relative to  $\Delta vp1$  strain). The  $\Delta PTS$ -HAL  
222 mutant and the  $\Delta vp1$ - $\Delta PTS$ -HAL double mutant showed a 1.4- and 1.5-fold reduction in  
223 hyaluronidase relative to the wild-type strain ( $p < 0.0005$ ). This reduction was similar to the  
224  $\Delta vp1$  strain compared to the wild-type strain. The majority of the hyaluronidase activity was  
225 captured within the pellets, suggesting that the majority of the degradation enzymes are

226 associated with the cell and not secreted into the supernatant. These data suggest that *vp1*  
227 and the PTS-HAL processing and transport operon promote degradation of HA.

228

229 To determine whether the ability to break down HA is conserved beyond the PMEN1  
230 strain PN4595-T23, we performed the same set of experiments in a TIGR4 background. The  
231 locus in TIGR4 resembles that of the PMEN1 strain, with the addition of a predicted  
232 transposon at the end of the operon (see graphic Fig S2A). The results were similar in that the  
233 genes encoded by the *vp1* operon (*vpo*) and HA processing and transport operon (PTS-HAL)  
234 contributed to the degradation of the HA polymer. In contrast to PN4595-T23, the majority of  
235 the TIGR4 activity was localized to the supernatant (Fig S3C), suggesting differences in the  
236 subcellular localization of the hyaluronidase activity between strains.

237

238 Finally, to investigate whether VP1 exerts its influence via genes encoded in the HA  
239 processing and transport operon, we tested whether overexpression of the PTS-HAL operon in  
240 a  $\Delta vp1$  background could rescue the wild-type phenotype in both TIGR4 and PN4595-T23  
241 strains. To this end, using the  $\Delta vp1$  backgrounds, we replaced the native promoter of PTS-  
242 HAL with a constitutive promoter (from *amiA* gene) (strain  $\Delta vp1$ -OE PTS-HAL)(80). These  
243 strains displayed HA degradation comparable to the isogenic wild-type strains ( $p = 0.21$ ) (Fig  
244 3B and S2C). These data suggest that *vp1* exerts its effect on HA metabolism via control of the  
245 gene products encoded in the PTS-HAL operon.

246

247 **Pneumococcus attaches to host HA in a process controlled by VP1 and mediated by**  
248 **molecules involved in HA processing.**

249 We have demonstrated that the *vp1* product enhances attachment of pneumococci to  
250 lung epithelial cells (Fig 1), and promotes transcription and activity of genes in the HA  
251 processing and transport operon associated with HA metabolism (Figs 2 and 3). Thus, we  
252 hypothesized that *vp1* influences attachment via its effect on the PTS-HAL operon. To test this  
253 hypothesis, we performed attachment assays in a strain with a deletion in the PTS-HAL operon  
254 ( $\Delta$ PTS-HAL); it displayed decreased attachment relative to the wild-type strain (Fig 4A).  
255 Moreover, the attachment defect observed in the  $\Delta$ *vp1* mutant was rescued to wild-type levels  
256 in the  $\Delta$ *vp1*-OE PTS-HAL strain where the genes in the PTS-HAL operon are expressed from a  
257 constitutive promoter. These data strongly suggest that the products of *vp1* and PTS-HAL  
258 promote adhesion and that the effect of *vp1* is exerted via its influence on PTS-HAL. Further,  
259 attachment levels for the double mutant  $\Delta$ *vp1 $\Delta$ PTS-HAL resembled that of the  $\Delta$ PTS-HAL  
260 strain consistent with these gene products acting within the same pathway (Figs S3A and  
261 S3B). The  $\Delta$ *regR* strain, with increased levels of expression for genes encoded in the PTS-  
262 HAL operon, resembled wild-type levels. The  $\Delta$ *hysA* strain displayed similar attachment to the  
263 wild-type strain, suggesting that genes in PTS-HAL are not promoting attachment via indirect  
264 effects on HysA (Fig S3A). The attachment of the wild-type and mutant strains were also  
265 visualized by confocal microscopy, and representative images are displayed in Fig 4B.  
266 Together, these data demonstrate that the *vp1* promotes attachment via its control of the  
267 genes in the PTS-HAL operon, responsible for processing and transport of HA.*

268

269 HA production in mammalian cells is controlled by at least three different, membrane-  
270 anchored hyaluronan synthases: *HAS1*, *HAS2*, and *HAS3* (35). Previous transcriptomic  
271 studies have reported that A549 cells exclusively express *HAS2* and *HAS3*, while *HAS1*  
272 remains undetectable (81). Our qPCR analysis corroborates these findings (Fig S3C). To

273 evaluate whether the HA produced by the A549 cells is implicated in pneumococcal  
274 attachment, we employed siRNA to knockdown the expression of *HAS2* and *HAS3*  
275 (independently and together) on A549 cells, and 48 h later, assessed the attachment strength  
276 of the wild-type strain. As a control for treatment, we used a scrambled construct for siRNA  
277 experiments, as well as *HAS1* because it has the low expression levels in A549 (Fig S3C and  
278 as described by Chow et al., 2010). At the 48h time point, the siRNA treatment reduced levels  
279 of *HAS2* and *HAS3* to below 20% when compared to the scrambled control (Fig S3D). Our  
280 attachment assays revealed a significant reduction in pneumococcal attachment to host cells  
281 where *HAS2* or *HAS3* were knockdown, with maximum reduction in the double knockdown  
282 cells (Fig 4C). These data suggest that pneumococcus binding is enhanced in the presence of  
283 host HA.

284

285 If products of the *vp1* gene and the PTS-HAL operon exert their influence on attachment  
286 via HA, a dramatic decrease in host HA levels should reduce the effect of these pneumococcal  
287 molecules on host attachment. Consistently, the  $\Delta vp1$  strain displayed similar levels of  
288 attachment on host cells independent of the levels of *HAS2* *HAS3*. Further, the  $\Delta$ PTS-HAL  
289 strain also displayed the same levels of attachment in host cells regardless of the levels of  
290 *HAS2* and *HAS3* (Fig 4C). Moreover, attachment of the  $\Delta$ PTS-HAL strain resembled levels of a  
291 wild-type strain on cells with reduced *HAS2* and *HAS3*, that is, substantially lower than  
292 attachment to wild type cells. Finally, a strain overexpressing the PTS-HAL operon in the  $\Delta vp1$   
293 background attached better in host cells that express HA. Thus, pneumococcus binding is  
294 enhanced by host HA, in a process that depends on the products of *vp1* and PTS-HAL.

295

296 The influence of HA in promoting pneumococcal binding is further corroborated by an  
297 experiment with exogenous HA. In one experiment, the addition of exogenous HA diminishes  
298 binding to A549, consistent with bacteria binding to detached HA (Fig S3E). In a second  
299 experiment, we coated 6-well plates with HA from *S. equis* (Fig S4A). A spot assay revealed  
300 that pneumococcal attachment was substantially higher on a surface coated with HA, relative  
301 to those without HA (Fig S4B). As observed on cells, the levels of attachment for  $\Delta vp1$  or  
302  $\Delta PTS$ -HAL strains were lower than that of the wild-type strain in HA-coated surfaces, and  
303 overexpression of the PTS-HAL operon in the  $\Delta vp1$  restored attachment to wild-type levels  
304 (Fig 4D). Moreover, these genetic changes had no significant effect on binding on surfaces  
305 that were not treated with HA. All together, these data demonstrate that the products of genes  
306 involved in the HA processing and transport promote the binding of pneumococcus to host HA  
307 in a process regulated by VP1.

308

### 309 **VP1 and the HA processing and transport operon promote pneumococcal colonization**

310 To establish the role of VP1 and of the PTS-HAL operon in pneumococcal survival in  
311 the nasopharynx, we employed the murine model of colonization. Cohorts of five mice were  
312 inoculated with single strains, using an inoculation dose of 20 $\mu$ l, where the wild-type strain  
313 colonizes the nasopharynx, but not the lungs (83,84). The bacterial load was measured two  
314 hours and seven days post-inoculation. Enumeration of pneumococci in the nasopharyngeal  
315 lavages two hours post-infection did not show any difference in bacterial load among the  
316 strains, indicating the accuracy of infection and the consistency in obtaining nasopharyngeal  
317 content (Fig 5A). Throughout the course of infection, the number of recovered wild-type  
318 pneumococci remained constant (Figs 5A and 5b).

319



320 Samples recovered seven days post-inoculation revealed significant differences in  
321 colony counts across the pneumococcal strains (Fig 5B). Our previous work, in the chinchilla  
322 model of pneumococcal disease, established that *vp1* is a virulence determinant based on the  
323 reduced mortality and decreased dissemination associated with the  $\Delta vp1$  strain relative to the  
324 wild-type strain (7). Akin to the chinchilla model, the  $\Delta vp1$  strain displayed a dramatic decrease  
325 in the murine model, where four out of five animals cleared the infection ( $p < 0.0001$ ).  
326 Complementation of *vp1* ( $\Delta vp1:vp1$ ) partially rescued the wild-type phenotype. The difference  
327 between wild-type and complement ( $\Delta vp1:vp1$ ) is likely due to changes in the dose driven by  
328 variation of the promoter. These data suggest that VP1 contributes to infection in multiple  
329 tissue types, as well as in carriage and disease.

330

331 By the seventh day post-inoculation, we also detected a significant reduction in colony  
332 counts in the  $\Delta PTS$ -HAL and the double  $\Delta vp1$ - $\Delta PTS$ -HAL mutants compared to the wild-type  
333 strain ( $p < 0.0001$ ). Moreover, overexpression of the PTS-HAL operon in the  $\Delta vp1$  background  
334 significantly increased the recovered pneumococci compare to  $\Delta vp1$  ( $p < 0.001$ ). Yet,  
335 overexpression of PTS-HAL in the wild-type background had no effect ( $p = 0.542$ ). The  
336 observation that the PTS-HAL operon can compensate for the absence of *vp1* is consistent  
337 with the model where VP1 acts upstream of HA processing (Figs 5 and 6). These results  
338 strongly suggest that VP1 and HA transport and metabolism play a critical role in  
339 pneumococcal colonization of the upper airways.

## 340 DISCUSSION

341 The binding of pneumococci to epithelial cells of the host mucosal surfaces is a crucial  
342 step during colonization and precedes dissemination to other tissues (3,85,86). In this study,  
343 we reveal a pneumococcal pathway that promotes adherence via host HA. We previously  
344 documented that the signaling peptide *vp1* is dramatically induced during host infection,  
345 enhances biofilm formation, and is a potent virulence determinant in a chinchilla model of  
346 middle ear infection (7). Here, we build on this work, providing mechanistic details that reveal  
347 links across signaling, adherence, and colonization. Specifically, we demonstrate that VP1  
348 controls genes involved in the transport and metabolism of the host glycosaminoglycan, HA.  
349 Our *in vitro* studies demonstrate that genes in the PTS-HAL operon enhance attachment of the  
350 pneumococcus to epithelial cells. Our *in vivo* studies on a murine model of colonization  
351 suggest that VP1 and the operon for HA transport and metabolism play critical roles in  
352 nasopharyngeal colonization.

353

354 VP1 is part of a regulatory network involved in nutritional sensing. Previous work  
355 demonstrated that the master nutritional regulator CodY negatively regulates the level of *vp1*  
356 transcripts, and positively regulated by the transcriptional regulator Rgg144 (18,87). The  
357 activity of Rgg144 (nomenclature based on gene name in D39, SPD\_0144) is regulated by a  
358 cognate peptide SHP144 (short hydrophobic peptide 144), which is secreted from cells and  
359 internalized into producing and neighboring cells where it binds to Rgg144 (7,18). Rgg144 is a  
360 negative regulator of the capsule: it directly binds a predicted promoter upstream of the  
361 capsular genes, inhibits the expression of capsular genes, and leads to a reduction in the size  
362 of the type 2 capsule (18). The bacterium capsule hinders cell adhesion by concealing  
363 bacterial receptors (88). In addition, our work on murine models shows that the Rgg144-

364 SHP144 system serves as a colonization factor in the nasopharynx and contributes to  
365 pathogenesis in pneumonia (18). These data are consistent with a model where the Rgg144-  
366 SHP144 system plays an essential role in colonization by decreasing the capsule and inducing  
367 *vp1*, and that together these events promote adhesion to epithelial cells in the nasopharynx  
368 and the lungs. Of note, adhesion experiments in this study were performed in CDM  
369 supplemented with glucose. In this condition, levels of *rgg144* are low, and levels of *vp1* are  
370 high (7,18). Thus, while Rgg144-SHP144 likely plays a key role in multiple aspects of  
371 colonization in our animal model, it is unlikely to be a major contributor *in vitro* experiments  
372 presented in this study. We propose that VP1 is a critical component of a complex cellular  
373 response to changes in nutritional status.

374

375 Our studies in the murine model of colonization reveal a dramatic defect for the *vp1*  
376 deletion mutant, where four out of five mice cleared the infection (Fig 5). The strain with a  
377 deletion of the HA transport and metabolism operon also displayed a decrease in bacterial  
378 load, but not of the same magnitude as the  $\Delta vp1$ . These data suggest that: (1) VP1 mediates  
379 attachment via control of the HA transport and metabolism operon, and (2) VP1 plays  
380 additional roles in colonization, which are mediated by yet unknown factors.

381

382 Many pneumococcal surface molecules serve as adhesins, mediating attachment of the  
383 bacteria to host cells (40,89,90). A subset of adhesins binds to extracellular matrix  
384 components. Pneumococcal virulence protein A and B (PavA and PavB) (91–93) and enolase  
385 (94,95) bind to fibronectin and plasminogen. Similarly, the plasmin- and fibronectin-binding  
386 proteins A and B (PfbA and PfbB) bind to the extracellular matrix and are required for  
387 adherence to lung and laryngeal epithelial cells (96,97). The choline-binding protein A (CbpA

388 or PspC) binds vitronectin (98), and PsrP binds to keratin (99). Pneumococcus also encodes  
389 surface-exposed glycosidases, which have been shown to contribute to adhesion not only via  
390 modification of the host surface that reveal receptors but also via direct binding (100). The  
391 glycosidase NanA (64) and the  $\beta$ -galactosidase BgaA (101), both process GAGs. NanA  
392 releases terminal sialic acid residues and BgaA releases terminal galactose residues from  
393 glycoconjugates. However, these enzymes promote attachment to host cells in a manner  
394 independent of their enzymatic activity. This observation is particularly evident for BgaA, where  
395 binding is mediated via a carbohydrate-binding module (102). Thus, the pneumococcal can  
396 employ glycosidases in host attachment. In this study, deletion of the surface exposed HysA  
397 strongly influenced HA processing (Fig 3), but not attachment (Fig 4). Thus, we deduce that  
398 the glycosidase HysA does not mediate the VP1-regulated defect in adhesion.

399

400 The data presented in this study strongly suggest that the transport and processing of  
401 host HA plays an essential role in adhesion. However, we have not yet established the  
402 molecular mechanism responsible for this outcome. Levels of regulators, carbohydrates, and  
403 transporters are interconnected in the bacterial cells via highly complex networks. Regulators  
404 control gene expression, including levels of transport systems and biosynthesis enzymes.  
405 Carbohydrates can function as substrates, and can positively or negatively influence the  
406 activity of regulators. Transporters not only control the import of carbohydrates, but the extent  
407 and position of phosphorylated residues on the cytoplasmic Hpr in the PTS system also  
408 controls CcpA-dependent carbon catabolite repression (103). CcpA influences the levels of  
409 almost one-fifth of pneumococcal genes, including ABC transporters and regulators (103,104).  
410 Thus, many molecular mechanisms may explain the connections between transporters and  
411 adhesions.

412

413           The HA transport and metabolism locus manipulated in this study encodes all the PTS-  
414 EII components (EIIA-EIIB, EIIC, and EIID) that specifically mediate HA import. The locus also  
415 encodes two additional genes for a putative heparinase and YajC, a component of the  
416 machinery associated with the secretion of proteins with N-terminal signal sequences (73),  
417 Data presented in Fig 4, where host HA levels are decreased using SiRNA knockdowns,  
418 strongly suggest that the PTS and VP1 mediate attachment, via a yet uncharacterized effector,  
419 in an HA-dependent manner.

420

421           Multiple lines of evidence suggest that GAGs facilitate attachment of multiple bacterial  
422 species to host cells. Several groups have explored and advanced the utilization of HA to  
423 facilitate attachment of bacteria to abiotic surfaces (49,105,106). A recent report showed that  
424 multidrug-resistant *Staphylococcus aureus* and *Pseudomonas aeruginosa* form more robust  
425 biofilms on surfaces coated with collagen and HA than on uncoated control surface (42). In  
426 addition, levels of GAGs on A549 cells were positively associated with the attachment of  
427 several pathogens, including *Staphylococcus aureus*, *Streptococcus pyogenes*, and the  
428 pneumococcus (43). Similarly, attachment of multiple bacterial species (both Gram-positive  
429 and Gram-negative) was positively associated with GAG levels on corneal epithelial cells HCE-  
430 2, well known for expressing a variety of GAGs on their surface (40). In yet another example,  
431 HA is the primary attachment site of *M. tuberculosis* in A549 cells (107). While HA has not  
432 been directly implicated in the attachment of pneumococcus, previous studies demonstrate  
433 that the pneumococcus can utilize HA as a carbon source. In particular, *hysA* and genes in the  
434 PTS-EII-encoding operon (EIIB, EIIC, EIID, and *ugtI*), are required for pneumococcal growth in  
435 media where HA is the only carbohydrate (56). Furthermore, HA supports *in vitro*

436 pneumococcal biofilm formation (57). These studies suggest that multiple bacteria may utilize  
437 host HA for attachment or nutrients and that control of each or both of these processes  
438 influences colonization and virulence.

439

440 In this study, we reveal a novel pathway involved in the attachment of the  
441 pneumococcus to host epithelial cells. Our working model is that Rgg144 and CodY monitor  
442 nutrient availability and, both of these transcription factors influence levels of the secreted  
443 peptide *vp1*. VP1, in turn, controls a genomic region involved in the transport and metabolism  
444 of HA, and these genes promote adherence in an HA-dependent manner. VP1 is encoded by a  
445 core gene, is highly expressed during infection, and is a significant contributor to both  
446 colonization and virulence. Thus, this molecule is a high-value candidate for the development  
447 of anti-pneumococcal therapies.

## 448 **MATERIALS AND METHODS**

449 **Bacterial strains and culture conditions.** Wild-type *S. pneumoniae* strain PN4595-T23  
450 (GenBank ABX001), was selected as a representative of the PMEN1 lineage (59–62). The  
451 clinical isolate TIGR4 (The Institute for Genomic Research, Aaberge et al., 1995), was  
452 graciously provided by Dr. Jason Rosch. The construction of the *vp1* deletion mutant ( $\Delta vp1$ )  
453 and the *vp1* complemented strain ( $\Delta vp1:\Delta vp1$ ) in the PN4595-T23 background was reported  
454 previously (7). Strain PN4595-T23 was modified to also generate the PTS-HAL operon  
455 deletion ( $\Delta$ PTS-HAL), the *hysA* deletion ( $\Delta hysA$ ), and the *regR* deletion ( $\Delta regR$ ). We generated  
456 a double mutant *vp1*-PTS ( $\Delta vp1-\Delta$ PTS-HAL) and a PTS-HAL overexpressor in the  $\Delta vp1$  and  
457 wild-type backgrounds ( $\Delta vp1$ -OE PTS-HAL and OE PTS-HAL, respectively) (S5 Table). A  
458 similar set of strains was constructed in the TIGR4 background (S5 Table). In this set, we  
459 generated a deletion mutant strain of the operon encoding *vp1* (*vpo*) and the *vpo*  
460 complemented strain ( $\Delta vpo::\Delta vpo$ ). For growth on solid media, strains were streaked onto  
461 Trypticase Soy Agar II plates (TSA) containing 5% sheep blood (BD BBL, New Jersey, USA).  
462 For growth in liquid culture, colonies from a frozen stock were grown overnight on TSA plates  
463 and inoculated into Columbia broth (Remel Microbiology Products, Thermo Fisher Scientific,  
464 USA). The media was supplemented with antibiotics as needed. Cultures were incubated at  
465 37°C and 5% CO<sub>2</sub> without shaking. Experiments in chemically defined medium (CDM) were  
466 performed utilizing a published recipe (104), and glucose was used at a final concentration of  
467 55mM. Growth in CDM was initiated by growing a pre-culture in Columbia broth for 2-3 hours  
468 and then diluted to an absorbance of 0.1 at 600 nm, this culture was then grown in CDM-Glu.

469

470 **Strain construction and transformation.** To generate the  $\Delta$ PTS-HAL mutant strain we used  
471 site-directed homologous recombination to replace genes SPN23F\_02950 to SPN23F\_0310

472 with a kanamycin-resistance gene (*kan*). Likewise, the PTS-HAL operon in the TIGR4 strain  
473 (SP\_0321 to SP\_0327) was replaced with *kan*. The *kan* region was originally amplified from an  
474 *rpsL* cassette (80). Gene IDs for PN4595-T23 and TIGR4 are listed in S3 Table. The same  
475 strategy was used for the single gene replacements, of *regR* (SPN23F\_03020) and *hysA*  
476 (SPN23F\_02890). To decrease the likelihood of polar effects in all our constructs, the strong  
477 artificial transcriptional terminator B1002 was inserted downstream of *kan* (109). Briefly, the  
478 transforming DNA was prepared by ligation of the kanamycin gene and promoter, with DNA  
479 (one to two kilobases) from the flanking regions upstream and downstream of the PTS-HAL  
480 operon. Flanking regions were amplified from the parental strains using either Q5 polymerase  
481 or OneTag polymerase (New England Biolabs). The OE PTS-HAL was generated in the  $\Delta vp1$   
482 and wild-type backgrounds by replacing the native PTS operon promoter with an *amiA*  
483 promoter and *kan* gene. Assembly of these transforming fragments was achieved by either  
484 sticky-end ligation of restriction enzyme-cut PCR products or by Gibson Assembly using  
485 NEBuilder HiFi DNA Assembly Cloning Kit. The resulting constructs were transformed into  
486 PN4595-T23 or TIGR4. Primers used to generate the constructs are listed in S4 Table.  
487 PN4595-T23 and TIGR4 strains were transformed with approximately 1  $\mu\text{g}$  of DNA. Liquid  
488 cultures were supplemented with 125  $\mu\text{g ml}^{-1}$  of CSP1 (EMRLSKFFRDFILQRKK, for TIGR4) or  
489 CSP2 (EMRISRIILDFLFLRKK, for PN4595-T23), at an absorbance of 0.05 at 600 nm  
490 (GenScript, NJ, USA), and incubated at 37°C. After 2 hours, the treated cultures were plated  
491 on Columbia agar containing the appropriate concentration of antibiotic for selection,  
492 spectinomycin, 100  $\mu\text{g ml}^{-1}$ , kanamycin 150  $\mu\text{g ml}^{-1}$ ). Resistant colonies were cultured in  
493 Columbia broth. Sequences were confirmed using DNA sequencing of the PCR amplicons  
494 (Genewiz, Inc., USA). All strains generated in this study are listed in S5 Table.

495



496 **RNA purification, reverse transcription (RT) and qPCR.** Bacterial samples were collected  
497 on RNALater (ThermoFisher), and pellets were lysed with 1x lysis mix containing 2 mg ml<sup>-1</sup> of  
498 proteinase K, 10 mg ml<sup>-1</sup> of lysozyme, and 20 µg ml<sup>-1</sup> mutanolysin in TE buffer (10 mM Tris·Cl,  
499 1 mM EDTA, pH 8.0) for 20 min. Total RNA was isolated using the RNeasy (Zymo Research)  
500 following manufacturer instructions. Contaminant DNA was removed by incubating total RNA  
501 samples with DNase (2U/µl) at 37°C for at least 15 min and then checked by amplification of  
502 *gapdh* (no visible band should be observable in RNA only samples). RT reaction was  
503 performed using 1 µg of total RNA using SuperscriptVILO kit for 1 h. Five ng of total cDNA was  
504 subjected to real-time PCR using PowerUp SYBR Green Master Mix in the ABI 7300 Real-  
505 Time PCR system (Applied Biosystems) according to the manufacturer's instructions. All qRT-  
506 PCR amplification was normalized to pneumococcal *gapdh* and expressed as fold change with  
507 respect to the wild-type strain. qPCR primers are listed in S4 Table. Primers were obtained  
508 from IDT (Integrated DNA Technologies).

509

510 **Spot assays and CFU counts.** Bacteria were inoculated from overnight plates into 20 ml of  
511 Columbia broth. Liquid cultures were grown statically and monitored at an optical density of  
512 600 nm using Nanodrop 2000c spectrophotometer (Thermo Scientific). Bacterial counts were  
513 assessed by streaking 10-fold dilutions on TSA or TSA-antibiotic containing plates. Spot  
514 assays were performed with 5 µl of ten-fold dilutions.

515

516 **Microarray Analysis:** We utilized the Pneumococcal Supragenome Hybridization Array  
517 (SpSGH) to compare gene expression between the wild-type PN4595-T23 strain and the  $\Delta vp1$   
518 as described previously (13). Pneumococcal cultures were collected and normalized to an  
519 absorbance of 0.3 at 600 nm. RNA extraction, cDNA preparation, and cDNA labeling were

520 performed as described previously (110). Cyber T was used for data analysis (111). Microarray  
521 experiments were performed in triplicate. Genes with at least a 3-fold difference between  
522 strains and a Bayesian  $p$ -value  $< 0.05$  were selected for further analysis. Microarray data for  
523 selected genes was confirmed by qPCR.

524

525 **Preparation of HA-coated surfaces.** Hyaluronic acid from *Streptococcus equi* (Sigma-  
526 Aldrich) was bound to tissue culture 24-wells plates following a previously described method  
527 with modifications (49). Briefly, twenty-four well plates (VWR) were treated with 0.5 ml of  
528 concentrated sulfuric acid for 10 min at 60°C, washed extensively with distilled water, then  
529 incubated for 2 h at 37°C with 0.5 ml 5 mg ml<sup>-1</sup> of hyaluronic acid. Finally, the plates were  
530 rinsed with distilled water and allowed to stand for 1h at room temperature. Plates were not  
531 dried during the entire procedure. Control plates were treated solely with either sulfuric acid or  
532 HA alone. Hyaluronic acid binding was assessed with 0.5 ml of 1% of Alcian Blue 8GX (Sigma-  
533 Aldrich) for 10 min at room temperature, then washed extensively with distilled water.

534

535 **Hyaluronidase activity measurement.** Hyaluronidase activity was measured as described  
536 previously (76,112). Briefly, pneumococcal cultures were grown in Columbia broth to an  
537 absorbance of 0.7 at 600 nm. Then the bacterial pellet and supernatant were obtained by  
538 centrifugation. Prior to the reaction, bacterial pellets were washed thoroughly with PBS at room  
539 temperature then diluted in 250  $\mu$ l of assay buffer while supernatant samples were diluted 1:1  
540 in assay buffer. Hyaluronic acid isolated from *Streptococcus equi* (Sigma Aldrich) was utilized  
541 at a final concentration of 10  $\mu$ g ml<sup>-1</sup> in assay buffer (150 mM NaCl, 200 mM sodium acetate,  
542 pH 6) for 15 min at 37°C. Stop buffer (2% NaOH, 2.5% cetrimide) was added to stop the  
543 reaction, and the absorbance at 400 nm was determined. Commercial hyaluronidase from

544 bovine testes (Sigma-Aldrich) was used as positive control. Assay results were calculated  
545 using the standard curve from the positive controls and by comparison to that of a blank  
546 comprised of assay buffer solely or without bacterial material.

547

548 **Mammalian cells and media growth conditions.** Epithelial lung human carcinoma A549 and  
549 fibroblast NIH-3T3 cells were propagated and maintained at 37°C and supplemented of 5%  
550 carbon dioxide at pH 7 in DMEM media contained 1% L-glutamine, 5% fetal bovine serum  
551 (FBS) without antibiotics. Chinchilla middle ear CMEE cells were maintained as previously  
552 reported (7,71).

553

554 **siRNA knockdown.** All transfection reagents were provided by Sigma-Aldrich. Subconfluent  
555 A549 cultures (20% to 30%) were seed in 24-wells plates and transfected with 3 pmol of a  
556 mixture containing pre-designed siRNA. Each mixture consisted of multiple siRNA targeting  
557 specifically either *HAS1*, *HAS2*, and *HAS3*. Universal control siRNA was used as a negative  
558 control. siRNA was transfected in a final volume of 100 µl of OptiMEM containing 3 µl of  
559 MISSION siRNA transfection reagent and no antibiotics. Twenty-four hours later the medium  
560 was replaced by DMEM supplemented with fetal bovine serum (FBS). Forty-eight hours after  
561 transfection, cells were used in adherence assays. To verify the reduction in *HAS* expression,  
562 A549 cells were lysed using the RNeasy kit and relative *HAS1*, *HAS2*, *HAS3*, and *ACTINB*  
563 expression was verified by qPCR, as described above.

564

565 **Pneumococcal host cell adherence assay.** A549, NIH-3T3 or CMEE were seed in 24-wells  
566 plates or on Lab-Tek II Chamber Slides (Thermo Fisher) at a density of  $1 \times 10^5$ , and

567 maintained without antibiotic until confluence. Before infection, the cell monolayer medium is  
568 replaced with fresh medium and then infected with pneumococci resuspended in DMEM  
569 supplemented with 1% FBS using a multiplicity of infection (MOI) of 50 bacteria per cell.  
570 Infected cells were incubated at 37°C in 5% CO<sub>2</sub> for 1 h. Then the media of post-infected cells  
571 was aspirated and washed thoroughly three times with PBS to remove unbound bacteria. The  
572 total number of adherent bacteria was released with saponin (1% w/v) for 15 minutes at 37 °C  
573 and plated on TSA plates followed by colony formation and enumeration. The effect of  
574 exogenous HA on attachment interference was performed through the addition of HA from  
575 *Streptococcus equi* at concentrations ranging between 0.01 to 1 mg/ml to the A549  
576 monolayers before the addition of the bacteria. Each experiment was repeated at least four  
577 times, and results were expressed as mean ± S.E.M.

578

579 **Confocal microscopy.** A549 cells were seeded on Nunc Lab-Tek 4-chamber (VWR) and  
580 inoculated with pneumococcal strains with a MOI of 50 as described above. After 1 hour of  
581 infection, cells were washed 3-times with PBS and fixed with 4% PFA, washed with PBS and  
582 stained with BODIPY FL Vancomycin (Thermo Fisher Scientific), Alexa Fluor 568-Phalloidin  
583 (Thermo Fisher Scientific) following manufacturer's instructions. Finally, cells were covered  
584 with Vectashield mounting media with DAPI (Vector Laboratories). Confocal microscopy was  
585 performed on the stage of Carl Zeiss LSM-880 META FCS, using 488 nm laser line for the  
586 fluorescence tag and 561 nm laser line for the fluorescence Alexa tag. Images were analyzed  
587 using ZEN Black software (Carl Zeiss Microscopy, Thornwood, NY) and assembled in Fiji  
588 (ImageJ. 2.0.0rc48). Laser intensity and gain were kept the same for all stacks and images.

589

590 ***In vivo* studies:** Colonization ability of pneumococcal strains were tested essentially as  
591 previously described (83,84). Nine-week-old CD1 mice were raised in the pre-clinical facility of  
592 the Leicester University. Mice were anesthetized lightly with 2.5% isoflurane over oxygen (1.5  
593 to 2 liter/min), and they were inoculated intranasally with 20  $\mu$ l PBS, pH 7.0, containing  
594 approximately  $5 \times 10^5$  CFU/mouse. When inoculating, mice were kept horizontally to prevent the  
595 dissemination of inoculum into the lower respiratory tract. A group of mice (n = 5) for each  
596 cohort were killed by cervical dislocation at 2 hours and 7 days after infection. After removing  
597 the mandible, nasopharyngeal cavity was accessed using a 18G needle through the soft  
598 palate, and the content of nasopharynx was collected by injecting 500  $\mu$ l PBS, pH 7.0. This  
599 process was repeated once more using the same lavage fluid in order to optimize the recovery  
600 of bacteria. Undiluted and serially diluted lavage fluid was plated on blood agar base plates  
601 and CFU/nasopharynx was calculated. The results were analyzed by two-way ANOVA  
602 followed by Tukey's multiple comparisons test.

603

604 **Ethics statement:** Mouse experiments were done under the UK Home Office approved  
605 project (permit no: P7B01C07A) and personal (permit no. I66A9D84D) licenses. The protocols  
606 used were approved by both the UK Home Office and the University of Leicester ethics  
607 committee. We used anesthetic during the procedure to minimize the suffering. Moreover, the  
608 animals were kept in individually ventilated cages, had access to water and feed *ad libido*, and  
609 their health were checked regularly in accordance with the legal and institutional requirements.

610

611 **Statistical analysis.** Statistical significance was assessed using Student's two-tailed *t*-test for  
612 independent samples, one-way ANOVA and Bonferroni's multiple comparisons test for

613 independent samples, and two-way ANOVA and Tukey's multiple comparisons test for animal  
614 data.  $p$ -values less than 0.05 were considered statistically significant.

## 615 **Acknowledgments**

616 We are very grateful to Dr. Aaron Mitchell and Dr. Frederick Lanni for their insightful  
617 suggestions and guidance during this project. We also thank Dr. Samantha King for productive  
618 discussions, particularly in regards to hyaluronic acid. We thank Dr. Haibing Teng from the  
619 Molecular Biosensor and Imaging Facility (MBIC) at Carnegie Mellon University for her  
620 assistance with confocal imaging. We thank Dr. Phil G. Campbell for providing A549 cells. This  
621 work was supported by NIH grant R01 AI139077-01A1 to N.L.H., the Eberly Family Career  
622 Development Professorship of Biological Science, an award from the Samuel and Emma  
623 Winters Foundation, as well as support from Carnegie Mellon University. The authors declare  
624 that there are no conflicts of interest.

625

## 626 **Author Contributions**

627 RAC contributed to the conception, design, experimentation, analysis and interpretation,  
628 and manuscript preparation; EE contributed with design and construction of bacterial clones,  
629 as well as data interpretation; OG contributed with *in vivo* experiments and data analysis, HY  
630 contributed with *in vivo* experiments, analysis and interpretation, and manuscript preparation;  
631 NLH contributed design, analysis and interpretation, and manuscript preparation.

## 632 **Figure Captions**

### 633 **Fig 1. *vp1* enhances pneumococcal attachment to epithelial cells.**

634 (A) A549 lung epithelial cells were exposed to the wild-type PMEN1 strain PN4595-T23, and  
635 isogenic *vp1* mutant and *vp1* complemented strains ( $\Delta vp1$  and the  $\Delta vp1:vp1$ , respectively) for  
636 1h at 37 °C. After washing the unbound bacteria, the remaining cell-bound bacteria were  
637 recovered and quantified on TSA plates. Visualization by a spot assay performed with 5  $\mu$ l of  
638 ten-fold dilutions (top panel). Quantification of the total number of bacteria bound to epithelial  
639 cells based on counts from TSA plates (bottom panel). (B) Representative image of wild-type  
640 and the  $\Delta vp1$  strains bound to A549 cells. Bacterial cells were stained with BODYPI-FL  
641 vancomycin (green), actin was visualized with TRITC-phalloidin (red), and bacterial and host  
642 DNA were visualized with DAPI (blue). Data on A represents the mean  $\pm$  S.E.M of at least six  
643 independent experiments. Statistical significance was calculated using unpaired one-way  
644 ANOVA analysis with Bonferroni correction, and multiple comparison between samples were  
645 performed. \*  $p < 0.0001$ , ns = not significant with  $p = 0.080$ .

646

### 647 **Fig 2. The *vp1* product positively regulates the expression of an operon critical to** 648 **processing of hyaluronic acid.**

649 (A) Microarray transcriptome analysis comparing the expression profiles of the wild-type  
650 PMEN1 strain PN4595-T23 and *vp1* derivative strain ( $\Delta vp1$ ) on CDM supplemented with  
651 glucose. Data was analyzed for statistical significance using CyberT as per Student's T-test.  
652 The dashed blue lines represent 4-fold up- and down-regulation, respectively. The red circle  
653 highlights genes associated with hyaluronic acid metabolism. (B) Selected genomic regions  
654 with 3-fold difference in expression between the wild-type and the  $\Delta vp1$  strains. Targets were



655 sorted by their genomic position on the genome. Operons are indicated by brackets. Color  
656 code illustrates expression ratio between the  $\Delta vp1$  strain relative to wild-type strain. Gene IDs  
657 correspond to those in PMEN1 reference strain ATCC700669 (GenBank FM211187), and the  
658 predicted functions based on Pfam. Full set presented in S1 Table.

659

660 **Fig 3. The *vp1* product promotes degradation of the hyaluronan polymer via its controls**  
661 **of the operon encoding the PTS-EII system.**

662 (A) Schematic of the genomic region implicated in the metabolism of hyaluronic acid. Arrows  
663 correspond to predicted open reading frames. Black and white denote predicted operons. Grey  
664 corresponds to genes involved in HA metabolism, but not highly controlled by *vp1*. The IDs  
665 refer to gene names in the PMEN1 reference strain ATCC700669. (B and C). Measurements  
666 of breakdown of hyaluronan and isogenic deletion mutants for *vp1* ( $\Delta vp1$ ), the hyaluronic acid  
667 locus PTS operon ( $\Delta$ PTS-HAL), *vp1* and the PTS operon ( $\Delta vp1$ - $\Delta$ PTS-HAL), *hysA* ( $\Delta hys$ ), and  
668 *regR* ( $\Delta regR$ ), and for a *vp1* complemented strains ( $\Delta vp1:vp1$ ), and a PTS overexpressor in  
669 the  $\Delta vp1$  background ( $\Delta vp1$ -OE PTS-HAL). Both the pellets (B) and the supernatants (C) of  
670 bacteria grown in liquid cultures were collected and assessed for hyaluronidase activity. Data  
671 on B and C represents the mean  $\pm$  S.E.M of at least six independent experiments. Statistical  
672 significance was calculated using unpaired one-way ANOVA analysis with Bonferroni  
673 correction, and multiple comparison between samples were performed. \*  $p < 0.05$ , \*\*  $p <$   
674  $0.001$ , ns = not significant relative to the wild-type strain. Note that on B, the complemented  
675  $\Delta vp1:vp1$  rescues the hyaluronidase deficiency of the  $\Delta vp1$  mutant ( $p < 0.0001$ ) and the  
676 overexpressor  $\Delta vp1$ -OE PTS-HAL rescues the hyaluronidase activity of the mutants  $\Delta vp1$  ( $p <$   
677  $0.0001$ ). Further, there is no significant difference between  $\Delta vp1$  and  $\Delta$ PTS-HAL, between  
678  $\Delta vp1$  and  $\Delta vp1$ - $\Delta$ PTS-HAL.

679

680 **Fig 4. Pneumococcus attaches to host HA in a process controlled by VP1 and mediated**  
681 **by molecules involved in HA processing.**

682 (A) The wild-type PN4595-T23,  $\Delta vp1$ ,  $\Delta PTS$ -HAL, and  $\Delta vp1$ -OE PTS-HAL strains were tested  
683 for attachment to epithelial A549 cells. Cell bound bacteria were enumerated by plating on  
684 TSA plates. (B) Representative image of strains attached to epithelial A549 cells. Bacterial  
685 cells were stained with BODYPI-FL vancomycin (green), actin was visualized with TRITC-  
686 phalloidin (red), and DNA was visualized with DAPI (blue). (C) Adherence measurements on  
687 A549 cells. *HAS1*-, *HAS2*-, and *HAS3*-knockdown, and the double-knockdown of *HAS2* and  
688 *HAS3* (*HAS2-3*) cells were exposed to wild-type and its derivative  $\Delta vp1$ ,  $\Delta PTS$ -HAL, and  $\Delta vp1$ -  
689 OE PTS-HAL strains. siRNA treatment was administered 48 h before addition of bacteria, and  
690 adherent bacteria were enumerated by plating on TSA plates. Bound bacteria were  
691 enumerated by plating cells on TSA plates. (D) The wild-type PN4595-T23 and its derivative  
692  $\Delta vp1$ ,  $\Delta PTS$ -HAL, and  $\Delta vp1$ -OE PTS-HAL strains were assessed for attachment to hyaluronic  
693 acid-coated surfaces in FBS-supplemented DMEM media. The total cell-bound bacteria were  
694 recovered and quantified by growth on TSA plates. Data on A, C, and D represents the mean  $\pm$   
695 S.E.M of at least four independent experiments. Statistical significance was calculated using  
696 unpaired one-way ANOVA (A and D) or two-ways ANOVA (C) analysis with Bonferroni  
697 correction, and multiple comparison between samples were performed. \*  $p < 0.05$ , \*\*\*\*  $p <$   
698 0.0001, ns = not significant. Note that the overexpressor  $\Delta vp1$ -OE PTS-HAL rescues the  
699 attachment deficiency of the mutant  $\Delta vp1$  ( $p < 0.0001$ ) in D.

700

701 **Fig 5. HA processing region is required for pneumococcal colonization.**

702 CD1 mice were inoculated intranasally with 20 ml PBS containing approximately  $5 \times 10^5$   
703 CFU/mouse. At 2 hours (day 0, A), and 7-days (B) post inoculation, nasopharyngeal contents  
704 were collected and pneumococci were enumerated. Each column represents the mean of data  
705 from five mice. Error bars show the standard error of the mean. Significant differences in  
706 bacterial counts are seen comparing to the wild-type strain using two-way ANOVA and Tukey's  
707 multiple comparisons test. \*  $p < 0.0005$ , ns = not significant. Note that at day 7, the  
708 complemented  $\Delta vp1:vp1$  rescues the colonization deficiency of the  $\Delta vp1$  mutant ( $p = 0.003$ ).  
709 Similarly, the overexpressor OE PTS-HAL rescues the colonization deficiency of the mutants  
710  $\Delta vp1$  ( $p < 0.0001$ ). The  $\Delta PTS$ -HAL ( $p = 0.0001$ ) and the double-mutant  $\Delta vp1$ - $\Delta PTS$ -HAL ( $p =$   
711  $0.0001$ ) both are significantly different from the wild-type strain and the colonization deficiency  
712 in the  $\Delta vp1$  strain is greater to the  $\Delta PTS$  strain ( $p = 0.0176$ ).

713

714 **Fig 6. Working model for VP1 regulation and its role in cell-cell communication in**  
715 ***Streptococcus pneumoniae*.**

716 The VP1 is processed and secreted into the extracellular milieu. *vp1* is highly upregulated in  
717 the presence of host cells and is induced by an upstream transcription factor, Rgg/Shp. In  
718 addition, previous work shows that levels of *vp1* respond to nutrients and to the master  
719 regulator CodY. VP1 induces changes in the expression of multiple operons, including two  
720 implicated in the processing and acquisition of hyaluronic acid. We propose that VP1 promotes  
721 attachment via its influence on the products of genes encoded in the PTS-HAL operon.

722

723 **Fig S1. *vp1* enhances pneumococcal attachment to epithelial cells.**

724 (A) A549 cells were inoculated with the wild-type PMEN1 strain PN4595-T23. After washing  
725 the unbound bacteria, the total cell-bound bacteria were recovered. For visualization, five  
726 microliters of ten-fold dilutions were used for spot assays on TSA plates (left panel). For  
727 quantification, the total number of bacteria was determined by enumeration on TSA plates  
728 (right panel). (B and C). Attachment assay were performed on CMEE cells (B) and NIH-3T3  
729 cells (C) inoculated with the strain wild-type PN4595-T23, the *vp1* mutant and *vp1*  
730 overexpressor strain ( $\Delta vp1$  and the  $\Delta vp1:vp1$ , respectively). As in A, cell-bound bacteria were  
731 recovered and enumerated on TSA plates (bottom panels). (D) A549 cells were inoculated with  
732 the wild-type TIGR4 strain and its derivative *vpo* mutant and *vpo* overexpressor strains ( $\Delta vpo$   
733 and the  $\Delta vpo::vpo$ , respectively). The total cell-bound bacteria were recovered and  
734 enumerated as in A. (E) Representative orthogonal view image of A549 cells inoculated with  
735 wild-type PN4595-T23. Note the extracellular *foci* indicating surface binding of the bacteria.  
736 Bacterial cells were stained with BODYPI-FL vancomycin (green), actin was visualized with  
737 TRITC-phalloidin (red), and bacterial and human DNA was visualized with DAPI (blue). Data  
738 on A, B, C, and D represents the mean  $\pm$  S.E.M of at least four independent experiments.  
739 Statistical significance was calculated using unpaired one-way ANOVA analysis with  
740 Bonferroni correction, and multiple comparison between samples were performed. \*  $p < 0.005$ ,  
741 \*\*  $p < 0.001$ , \*\*\*  $p < 0.0001$ , ns = not significant.

742

743 **Fig S2. The *vp1* product promotes degradation of the hyaluronan polymer via its**  
744 **controls of the operon encoding the PTS-EII system in TIGR4.**

745 (A) Schematic of the genomic region implicated in the metabolism of hyaluronic acid. Arrows  
746 correspond to predicted open reading frames in TIGR4. Black and white denote predicted  
747 operons; PTS-HAL has two additional open reading frames at the end of the predicted operon

748 (represented in white). Grey corresponds to genes involved in HA metabolism, but not highly  
749 controlled by *vp1*. The IDs refer to gene names in the TIGR4 genome. (B and C)  
750 Measurements of breakdown of hyaluronan by strain TIGR4 and isogenic mutants. Both the  
751 supernatants (B) and the pellets (C) of bacteria grown in liquid cultures were collected and  
752 assessed for hyaluronidase activity relative to the wild-type strain. Data on B and C represents  
753 the mean  $\pm$  S.E.M of 8 independent experiments. Statistical significance was calculated using  
754 unpaired one-way ANOVA analysis with Bonferroni correction, and multiple comparison  
755 between samples were performed. \*  $p < 0.05$ , \*\*  $p < 0.05$ , \*\*\*  $p < 0.0001$  ns = not significant  
756 relative to the wild-type strain. Note that on C, the  $\Delta vpo:vpo$  rescues the hyaluronidase  
757 deficiency of the  $\Delta vpo$  mutant ( $p < 0.0001$ ) and the overexpressor  $\Delta vpo$ -OE PTS-HAL rescues  
758 the hyaluronidase activity of the mutants  $\Delta vpo$  ( $p < 0.0001$ ). Further,  $\Delta vpo$ -OE PTS-HAL is  
759 also significantly different from the double-mutant  $\Delta vpo$ - $\Delta$ PTS-HAL ( $p < 0.0001$ ).

760

761 **Fig S3. Pneumococcus attaches to host HA in a process controlled by VP1 and**  
762 **mediated by molecules involved in hyaluronic acid processing.**

763 (A) Spot assay to assess attachment to host cells. The wild-type PN4595-T23, and its  
764 derivative strains  $\Delta vp1$ ,  $\Delta vp1:vp1$ ,  $\Delta$ PTS-HAL,  $\Delta vp1$ - $\Delta$ PTS-HAL,  $\Delta vp1$ -OE PTS and  $\Delta hysA$ ,  
765 were assessed for attachment to A549 cells using a spot assay. After washing the unbound  
766 bacteria, the total cell-bound bacteria were recovered and plated on TSA plates. (B)  
767 Quantification of binding, where the total number of the  $\Delta vp1$ - $\Delta$ PTS,  $\Delta regR$  and  $\Delta hysA$ , bound  
768 to epithelial cells was enumerated on TSA plates. (C) Measurement of the expression levels of  
769 hyaluronic acid synthases-encoding genes *HAS1*, *HAS2*, and *HAS3* in A549 cells at two time  
770 points where levels are compared to treatment with a scrambled control. (D) Measurement of  
771 the expression levels of hyaluronic acid synthases-encoding genes *HAS2* and *HAS3* after

772 treatment with specific siRNA. (E) Quantification of bacterial binding to A549 pre-incubated  
773 with varying concentration of HA. Data on B to E represents the mean  $\pm$  S.E.M of at least four  
774 independent experiments. Statistical significance was calculated using unpaired one-way  
775 ANOVA (B, D, and E) analysis with Bonferroni correction, and multiple comparison between  
776 samples were performed. \*  $p < 0.005$ , \*\*  $p < 0.0001$ , ns = not significant.

777

778 **Fig S4. *vp1* mediates attachment to hyaluronic acid of *Streptococcus equis* via genes in**  
779 **the PTS-HAL operon.**

780 (A) hyaluronic acid (HA) coating of 6 well plates under listed treatments, visualized by staining  
781 with Alcian Blue 8GX. (B) The PMEN1 strain PN4595-T23 (top panel) was assessed for  
782 attachment to hyaluronic acid-coated surfaces in FBS-supplemented DMEM media (A549  
783 growth media) or Columbia broth (bacterial growth media). The total cell-bound bacteria were  
784 recovered and tested for growth on TSA plates.

## 785 REFERENCES

786

- 787 1. Troeger C, Blacker B, Khalil I. Estimates of the global, regional, and national morbidity,  
788 mortality, and aetiologies of lower respiratory infections in 195 countries, 1990-2016: a  
789 systematic analysis for the Global Burden of Disease Study 2016. *Lancet Infect Dis.*  
790 2018;18(11):1191–210.
- 791 2. Murdoch DR, Howie SRC. The global burden of lower respiratory infections: making  
792 progress, but we need to do better. *Lancet Infect Dis.* 2018;18(11):1162–3.
- 793 3. Weiser JN, Ferreira DM, Paton JC. *Streptococcus pneumoniae*: transmission,  
794 colonization and invasion. *Nat Rev Microbiol.* 2018 Jun;16(6):355–67.
- 795 4. Brown AO, Mann B, Gao G, Hankins JS, Humann J, Giardina J, et al. *Streptococcus*  
796 *pneumoniae* Translocates into the Myocardium and Forms Unique Microlesions That  
797 Disrupt Cardiac Function. *PLOS Pathog.* 2014 Sep 18;10(9):e1004383.
- 798 5. Loughran AJ, Orihuela CJ, Tuomanen EI. *Streptococcus pneumoniae*: Invasion and  
799 Inflammation. *Microbiol Spectr.* 2019;7(2).
- 800 6. Aggarwal SD, Eutsey R, West-Roberts J, Domenech A, Xu W, Abdullah IT, et al.  
801 Function of BriC peptide in the pneumococcal competence and virulence portfolio. *PLoS*  
802 *Pathog* [Internet]. 2018 Oct 11 [cited 2019 Jul 29];14(10). Available from:  
803 <https://www.ncbi.nlm.nih.gov/pmc/articles/PMC6181422/>
- 804 7. Cuevas RA, Eutsey R, Kadam A, West-Roberts JA, Woolford CA, Mitchell AP, et al. A  
805 novel streptococcal cell-cell communication peptide promotes pneumococcal virulence  
806 and biofilm formation. *Mol Microbiol.* 2017 Aug;105(4):554–71.
- 807 8. Dawid S, Roche AM, Weiser JN. The blp bacteriocins of *Streptococcus pneumoniae*  
808 mediate intraspecies competition both in vitro and in vivo. *Infect Immun.* 2007  
809 Jan;75(1):443–51.
- 810 9. de Saizieu A, Gardès C, Flint N, Wagner C, Kamber M, Mitchell TJ, et al. Microarray-  
811 based identification of a novel *Streptococcus pneumoniae* regulon controlled by an  
812 autoinduced peptide. *J Bacteriol.* 2000 Sep;182(17):4696–703.
- 813 10. Havarstein LS, Coomaraswamy G, Morrison DA. An unmodified heptadecapeptide  
814 pheromone induces competence for genetic transformation in *Streptococcus*  
815 *pneumoniae*. *Proc Natl Acad Sci U S A.* 1995 Nov 21;92(24):11140–4.
- 816 11. Hoover SE, Perez AJ, Tsui H-CT, Sinha D, Smiley DL, DiMarchi RD, et al. A new  
817 quorum-sensing system (TprA/PhrA) for *Streptococcus pneumoniae* D39 that regulates a  
818 lantibiotic biosynthesis gene cluster. *Mol Microbiol.* 2015 Apr 13;
- 819 12. Junges R, Salvadori G, Shekhar S, Åmdal HA, Periselneris JN, Chen T, et al. A Quorum-  
820 Sensing System That Regulates *Streptococcus pneumoniae* Biofilm Formation and  
821 Surface Polysaccharide Production. *mSphere* [Internet]. 2017 Sep 13;2(5). Available  
822 from: <https://www.ncbi.nlm.nih.gov/pmc/articles/PMC5597970/>

- 823 13. Kadam A, Eutsey RA, Rosch J, Miao X, Longwell M, Xu W, et al. Promiscuous signaling  
824 by a regulatory system unique to the pandemic PMEN1 pneumococcal lineage. *PLOS*  
825 *Pathog.* 2017 May 18;13(5):e1006339.
- 826 14. Lux T, Nuhn M, Hakenbeck R, Reichmann P. Diversity of Bacteriocins and Activity  
827 Spectrum in *Streptococcus pneumoniae*. *J Bacteriol.* 2007 Nov;189(21):7741–51.
- 828 15. Motib Anfal, Guerreiro Antonio, Al-Bayati Firas, Piletska Elena, Manzoor Irfan, Shafeeq  
829 Sulman, et al. Modulation of Quorum Sensing in a Gram-Positive Pathogen by Linear  
830 Molecularly Imprinted Polymers with Anti-infective Properties. *Angew Chem.* 2017 Nov  
831 30;129(52):16782–5.
- 832 16. Motib AS, Al-Bayati FAY, Manzoor I, Shafeeq S, Kadam A, Kuipers OP, et al. TprA/PhrA  
833 Quorum Sensing System Has a Major Effect on Pneumococcal Survival in Respiratory  
834 Tract and Blood, and Its Activity Is Controlled by CcpA and GlnR. *Front Cell Infect*  
835 *Microbiol* [Internet]. 2019 [cited 2019 Sep 20];9. Available from:  
836 <https://www.frontiersin.org/articles/10.3389/fcimb.2019.00326/full>
- 837 17. Tomasz A. Control of the Competent State in *Pneumococcus* by a Hormone-Like Cell  
838 Product: An Example for a New Type of Regulatory Mechanism in Bacteria. *Nature.*  
839 1965 Oct 9;208(5006):155–9.
- 840 18. Zhi X, Abdullah IT, Gazioglu O, Manzoor I, Shafeeq S, Kuipers OP, et al. Rgg-Shp  
841 regulators are important for pneumococcal colonization and invasion through their effect  
842 on mannose utilization and capsule synthesis. *Sci Rep.* 2018 Apr 23;8(1):6369.
- 843 19. Havarstein LS, Diep DB, Nes IF. A family of bacteriocin ABC transporters carry out  
844 proteolytic processing of their substrates concomitant with export. *Mol Microbiol.* 1995  
845 Apr 1;16(2):229–40.
- 846 20. Aprianto R, Slager J, Holsappel S, Veening J-W. High-resolution analysis of the  
847 pneumococcal transcriptome under a wide range of infection-relevant conditions. *Nucleic*  
848 *Acids Res.* 2018 02;46(19):9990–10006.
- 849 21. Hall-Stoodley L, Hu FZ, Gieseke A, Nistico L, Nguyen D, Hayes J, et al. Direct Detection  
850 of Bacterial Biofilms on the Middle-Ear Mucosa of Children With Chronic Otitis Media.  
851 *JAMA J Am Med Assoc.* 2006 Jul 12;296(2):202–11.
- 852 22. Hoa M, Syamal M, Sachdeva L, Berk R, Coticchia J. Demonstration of nasopharyngeal  
853 and middle ear mucosal biofilms in an animal model of acute otitis media. *Ann Otol*  
854 *Rhinol Laryngol.* 2009 Apr;118(4):292–8.
- 855 23. Post JC, Hiller NL, Nistico L, Stoodley P, Ehrlich GD. The role of biofilms in  
856 otolaryngologic infections: update 2007. *Curr Opin Otolaryngol Head Neck Surg.* 2007  
857 Oct;15(5):347–51.
- 858 24. Sanderson AR, Leid JG, Hunsaker D. Bacterial biofilms on the sinus mucosa of human  
859 subjects with chronic rhinosinusitis. *The Laryngoscope.* 2006 Jul;116(7):1121–6.



- 860 25. Chao Y, Marks LR, Pettigrew MM, Hakansson AP. Streptococcus pneumoniae biofilm  
861 formation and dispersion during colonization and disease. Front Cell Infect Microbiol.  
862 2015;4(January):194.
- 863 26. Marks LR, Davidson BA, Knight PR, Hakansson AP. Interkingdom Signaling Induces  
864 Streptococcus pneumoniae Biofilm Dispersion and Transition from Asymptomatic  
865 Colonization to Disease. mBio. 2013;4(4):e00438-13.
- 866 27. Chao Y, Marks LR, Pettigrew MM, Hakansson AP. Streptococcus pneumoniae biofilm  
867 formation and dispersion during colonization and disease. Front Cell Infect Microbiol.  
868 2014;4:194.
- 869 28. Croucher NJ, Harris SR, Barquist L, Parkhill J, Bentley SD. A high-resolution view of  
870 genome-wide pneumococcal transformation. PLoS Pathog. 2012;8(6):e1002745.
- 871 29. Marks LR, Parameswaran GI, Hakansson AP. Pneumococcal interactions with epithelial  
872 cells are crucial for optimal biofilm formation and colonization in vitro and in vivo. Infect  
873 Immun. 2012 Aug;80(8):2744–60.
- 874 30. Tonnaer EL, Mylanus EA, Mulder JJ, Curfs JH. Detection of bacteria in healthy middle  
875 ears during cochlear implantation. Arch Otolaryngol Head Neck Surg. 2009  
876 Mar;135(3):232–7.
- 877 31. Trappetti C, Gualdi L, Meola LD, Jain P, Korir CC, Edmonds P, et al. The impact of the  
878 competence quorum sensing system on Streptococcus pneumoniae biofilms varies  
879 depending on the experimental model. BMC Microbiol. 2011 Apr 14;11(1):75.
- 880 32. Vidal JE, Ludewick HP, Kunkel RM, Zähner D, Klugman KP. The LuxS-Dependent  
881 Quorum-Sensing System Regulates Early Biofilm Formation by Streptococcus  
882 pneumoniae Strain D39. Infect Immun. 2011 Oct;79(10):4050–60.
- 883 33. Couchman JR, Pataki CA. An Introduction to Proteoglycans and Their Localization. J  
884 Histochem Cytochem. 2012 Dec;60(12):885–97.
- 885 34. Iozzo RV, Schaefer L. Proteoglycan form and function: A comprehensive nomenclature  
886 of proteoglycans. Matrix Biol J Int Soc Matrix Biol. 2015 Mar;42:11–55.
- 887 35. Weigel PH, DeAngelis PL. Hyaluronan synthases: a decade-plus of novel  
888 glycosyltransferases. J Biol Chem. 2007 Dec 21;282(51):36777–81.
- 889 36. Pomin VH, Mulloy B. Glycosaminoglycans and Proteoglycans. Pharmaceuticals  
890 [Internet]. 2018 Feb 27 [cited 2019 Sep 3];11(1). Available from:  
891 <https://www.ncbi.nlm.nih.gov/pmc/articles/PMC5874723/>
- 892 37. Taylor KR, Gallo RL. Glycosaminoglycans and their proteoglycans: host-associated  
893 molecular patterns for initiation and modulation of inflammation. FASEB J Off Publ Fed  
894 Am Soc Exp Biol. 2006 Jan;20(1):9–22.
- 895 38. Andre GO, Converso TR, Politano WR, Ferraz LFC, Ribeiro ML, Leite LCC, et al. Role of  
896 Streptococcus pneumoniae Proteins in Evasion of Complement-Mediated Immunity.  
897 Front Microbiol. 2017;8:224.

- 898 39. Frolet C, Beniazza M, Roux L, Gallet B, Noirclerc-Savoie M, Vernet T, et al. New  
899 adhesin functions of surface-exposed pneumococcal proteins. *BMC Microbiol.* 2010 Jul  
900 12;10:190.
- 901 40. García B, Merayo-Lloves J, Rodríguez D, Alcalde I, García-Suárez O, Alfonso JF, et al.  
902 Different Use of Cell Surface Glycosaminoglycans As Adherence Receptors to Corneal  
903 Cells by Gram Positive and Gram Negative Pathogens. *Front Cell Infect Microbiol.*  
904 2016;6:173.
- 905 41. Hammerschmidt S. Adherence molecules of pathogenic pneumococci. *Curr Opin*  
906 *Microbiol.* 2006 Feb;9(1):12–20.
- 907 42. Birkenhauer E, Neethirajan S, Weese JS. Collagen and hyaluronan at wound sites  
908 influence early polymicrobial biofilm adhesive events. *BMC Microbiol.* 2014 Jul  
909 16;14:191.
- 910 43. Rajas O, Quirós LM, Ortega M, Vazquez-Espinosa E, Merayo-Lloves J, Vazquez F, et al.  
911 Glycosaminoglycans are involved in bacterial adherence to lung cells. *BMC Infect Dis.*  
912 2017 02;17(1):319.
- 913 44. Bhaskar KR, O’Sullivan DD, Opaskar-Hincman H, Reid LM, Coles SJ. Density gradient  
914 analysis of secretions produced in vitro by human and canine airway mucosa:  
915 identification of lipids and proteoglycans in such secretions. *Exp Lung Res.*  
916 1986;10(4):401–22.
- 917 45. Monzon ME, Casalino-Matsuda SM, Forteza RM. Identification of glycosaminoglycans in  
918 human airway secretions. *Am J Respir Cell Mol Biol.* 2006 Feb;34(2):135–41.
- 919 46. Jiang D, Liang J, Noble PW. Regulation of non-infectious lung injury, inflammation, and  
920 repair by the extracellular matrix glycosaminoglycan hyaluronan. *Anat Rec Hoboken NJ*  
921 2007. 2010 Jun;293(6):982–5.
- 922 47. Jiang D, Liang J, Noble PW. Hyaluronan in tissue injury and repair. *Annu Rev Cell Dev*  
923 *Biol.* 2007;23:435–61.
- 924 48. Lennon FE, Singleton PA. Role of hyaluronan and hyaluronan-binding proteins in lung  
925 pathobiology. *Am J Physiol Lung Cell Mol Physiol.* 2011 Aug;301(2):L137-147.
- 926 49. Kujawa MJ, Caplan AI. Hyaluronic acid bonded to cell-culture surfaces stimulates  
927 chondrogenesis in stage 24 limb mesenchyme cell cultures. *Dev Biol.* 1986  
928 Apr;114(2):504–18.
- 929 50. Nusgens B-V. [Hyaluronic acid and extracellular matrix: a primitive molecule?]. *Ann*  
930 *Dermatol Venereol.* 2010 Apr;137 Suppl 1:S3-8.
- 931 51. Solis MA, Chen Y-H, Wong TY, Bittencourt VZ, Lin Y-C, Huang LLH. Hyaluronan  
932 regulates cell behavior: a potential niche matrix for stem cells. *Biochem Res Int.*  
933 2012;2012:346972.

- 934 52. Bidossi A, Mulas L, Decorosi F, Colomba L, Ricci S, Pozzi G, et al. A functional  
935 genomics approach to establish the complement of carbohydrate transporters in  
936 *Streptococcus pneumoniae*. *PLoS One*. 2012;7(3):e33320.
- 937 53. Oiki S, Mikami B, Maruyama Y, Murata K, Hashimoto W. A bacterial ABC transporter  
938 enables import of mammalian host glycosaminoglycans. *Sci Rep*. 2017 21;7(1):1069.
- 939 54. Chapuy-Regaud S, Ogunniyi AD, Diallo N, Huet Y, Desnottes J-F, Paton JC, et al. RegR,  
940 a global LacI/GalR family regulator, modulates virulence and competence in  
941 *Streptococcus pneumoniae*. *Infect Immun*. 2003 May;71(5):2615–25.
- 942 55. Maruyama Y, Nakamichi Y, Itoh T, Mikami B, Hashimoto W, Murata K. Substrate  
943 specificity of streptococcal unsaturated glucuronyl hydrolases for sulfated  
944 glycosaminoglycan. *J Biol Chem*. 2009 Jul 3;284(27):18059–69.
- 945 56. Marion C, Stewart JM, Tazi MF, Burnaugh AM, Linke CM, Woodiga SA, et al.  
946 *Streptococcus pneumoniae* can utilize multiple sources of hyaluronic acid for growth.  
947 *Infect Immun*. 2012 Apr;80(4):1390–8.
- 948 57. Yadav MK, Chae S-W, Park K, Song J-J. Hyaluronic acid derived from other streptococci  
949 supports *Streptococcus pneumoniae* in vitro biofilm formation. *BioMed Res Int*.  
950 2013;2013:690217.
- 951 58. Hendriksen WT, Bootsma HJ, Estevão S, Hoogenboezem T, de Jong A, de Groot R, et  
952 al. CodY of *Streptococcus pneumoniae*: link between nutritional gene regulation and  
953 colonization. *J Bacteriol*. 2008 Jan;190(2):590–601.
- 954 59. Croucher NJ, Harris SR, Fraser C, Quail MA, Burton J, van der Linden M, et al. Rapid  
955 pneumococcal evolution in response to clinical interventions. *Science*. 2011 Jan  
956 28;331(6016):430–4.
- 957 60. Hiller NL, Eutsey RA, Powell E, Earl JP, Janto B, Martin DP, et al. Differences in  
958 Genotype and Virulence among Four Multidrug-Resistant *Streptococcus pneumoniae*  
959 Isolates Belonging to the PMEN1 Clone. *PLoS ONE*. 2011 Dec 19;6(12):e28850.
- 960 61. Neshin M, Ramirez M, Tomasz A. Capsular transformation of a multidrug-resistant  
961 *Streptococcus pneumoniae* in vivo. *J Infect Dis*. 1998 Mar;177(3):707–713.
- 962 62. Wyres KL, Lambertsen LM, Croucher NJ, McGee L, von Gottberg A, Liñares J, et al.  
963 Pneumococcal capsular switching: a historical perspective. *J Infect Dis*. 2013 Feb  
964 1;207(3):439–49.
- 965 63. Tettelin H, Nelson KE, Paulsen IT, Eisen JA, Read TD, Peterson S, et al. Complete  
966 genome sequence of a virulent isolate of *Streptococcus pneumoniae*. *Science*. 2001 Jul  
967 20;293(5529):498–506.
- 968 64. Brittan JL, Buckeridge TJ, Finn A, Kadioglu A, Jenkinson HF. Pneumococcal  
969 neuraminidase A: an essential upper airway colonization factor for *Streptococcus*  
970 *pneumoniae*. *Mol Oral Microbiol*. 2012 Aug;27(4):270–83.

- 971 65. Kjos M, Aprianto R, Fernandes VE, Andrew PW, van Strijp JAG, Nijland R, et al. Bright  
972 fluorescent *Streptococcus pneumoniae* for live-cell imaging of host-pathogen  
973 interactions. *J Bacteriol.* 2015 Mar;197(5):807–18.
- 974 66. Balis JU, Bumgarner SD, Paciga JE, Paterson JF, Shelley SA. Synthesis of lung  
975 surfactant-associated glycoproteins by A549 cells: description of an in vitro model for  
976 human type II cell dysfunction. *Exp Lung Res.* 1984;6(3–4):197–213.
- 977 67. Lieber M, Smith B, Szakal A, Nelson-Rees W, Todaro G. A continuous tumor-cell line  
978 from a human lung carcinoma with properties of type II alveolar epithelial cells. *Int J*  
979 *Cancer.* 1976 Jan 15;17(1):62–70.
- 980 68. Nardone LL, Andrews SB. Cell line A549 as a model of the type II pneumocyte.  
981 Phospholipid biosynthesis from native and organometallic precursors. *Biochim Biophys*  
982 *Acta.* 1979 May 25;573(2):276–95.
- 983 69. Berger JT, Voynow JA, Peters KW, Rose MC. Respiratory carcinoma cell lines. MUC  
984 genes and glycoconjugates. *Am J Respir Cell Mol Biol.* 1999 Mar;20(3):500–10.
- 985 70. Carterson AJ, Höner zu Bentrup K, Ott CM, Clarke MS, Pierson DL, Vanderburg CR, et  
986 al. A549 lung epithelial cells grown as three-dimensional aggregates: alternative tissue  
987 culture model for *Pseudomonas aeruginosa* pathogenesis. *Infect Immun.* 2005  
988 Feb;73(2):1129–40.
- 989 71. Raffel FK, Szelestey BR, Beatty WL, Mason KM. The *Haemophilus influenzae* Sap  
990 transporter mediates bacterium-epithelial cell homeostasis. *Infect Immun.*  
991 2013;81(1):43–54.
- 992 72. Cook LC, Federle MJ. Peptide pheromone signaling in *Streptococcus* and *Enterococcus*.  
993 *FEMS Microbiol Rev.* 2014 May;38(3):473–92.
- 994 73. Martin R, Larsen AH, Corey RA, Midtgaard SR, Frielinghaus H, Schaffitzel C, et al.  
995 Structure and Dynamics of the Central Lipid Pool and Proteins of the Bacterial Holo-  
996 Translocon. *Biophys J.* 2019 May 21;116(10):1931–40.
- 997 74. Kelley LA, Mezulis S, Yates CM, Wass MN, Sternberg MJE. The Phyre2 web portal for  
998 protein modeling, prediction and analysis. *Nat Protoc.* 2015 Jun;10(6).
- 999 75. Dong W, Lu W, McKeehan WL, Luo Y, Ye S. Structural basis of heparan sulfate-specific  
000 degradation by heparinase III. *Protein Cell.* 2012 Dec;3(12):950–61.
- 001 76. Ma K, Cao Q, Luo S, Wang Z, Liu G, Lu C, et al. cas9 Enhances Bacterial Virulence by  
002 Repressing the regR Transcriptional Regulator in *Streptococcus agalactiae*. *Infect*  
003 *Immun.* 2018;86(3).
- 004 77. Reese MG. Application of a time-delay neural network to promoter annotation in the  
005 *Drosophila melanogaster* genome. *Comput Chem.* 2001 Dec;26(1):51–6.
- 006 78. Solovyev V, Salamov A. Automatic Annotation of Microbial Genomes and Metagenomic  
007 Sequences. In *Metagenomics and its Applications in Agriculture, Biomedicine and*  
008 *Environmental Studies.* Nova Science Publisher; 2011. 61–78 p.

- .009 79. Takao A. Cloning and expression of hyaluronate lyase genes of *Streptococcus*  
.010 *intermedius* and *Streptococcus constellatus* subsp. *constellatus*(1). *FEMS Microbiol Lett.*  
.011 2003 Feb 14;219(1):143–50.
- .012 80. Sung CK, Li H, Claverys JP, Morrison DA. An *rpsL* Cassette, Janus, for Gene  
.013 Replacement through Negative Selection in *Streptococcus pneumoniae*. *Appl Environ*  
.014 *Microbiol.* 2001 Nov;67(11):5190–6.
- .015 81. Wang T, Cui Y, Jin J, Guo J, Wang G, Yin X, et al. Translating mRNAs strongly correlate  
.016 to proteins in a multivariate manner and their translation ratios are phenotype specific.  
.017 *Nucleic Acids Res.* 2013 May;41(9):4743–54.
- .018 82. Chow G, Tauler J, Mulshine JL. Cytokines and growth factors stimulate hyaluronan  
.019 production: role of hyaluronan in epithelial to mesenchymal-like transition in non-small  
.020 cell lung cancer. *J Biomed Biotechnol.* 2010;2010:485468.
- .021 83. Glanville DG, Han L, Maule AF, Woodacre A, Thanki D, Abdullah IT, et al. RitR is an  
.022 archetype for a novel family of redox sensors in the streptococci that has evolved from  
.023 two-component response regulators and is required for pneumococcal colonization.  
.024 *PLoS Pathog.* 2018;14(5):e1007052.
- .025 84. Kahya HF, Andrew PW, Yesilkaya H. Deacetylation of sialic acid by esterases  
.026 potentiates pneumococcal neuraminidase activity for mucin utilization, colonization and  
.027 virulence. *PLOS Pathog.* 2017 Mar 3;13(3):e1006263.
- .028 85. Bogaert D, de Groot R, Hermans P. *Streptococcus pneumoniae* colonisation: the key to  
.029 pneumococcal disease. *Lancet Infect Dis.* 2004 Mar;4(3):144–54.
- .030 86. Kadioglu A, Weiser JN, Paton JC, Andrew PW. The role of *Streptococcus pneumoniae*  
.031 virulence factors in host respiratory colonization and disease. *Nat Rev Microbiol.* 2008  
.032 Apr;6(4):288–301.
- .033 87. Hendriksen WT, Bootsma HJ, Estevão S, Hoogenboezem T, de Jong A, de Groot R, et  
.034 al. CodY of *Streptococcus pneumoniae*: link between nutritional gene regulation and  
.035 colonization. *J Bacteriol.* 2008 Jan;190(2):590–601.
- .036 88. Lysenko ES, Lijek RS, Brown SP, Weiser JN. Within-host competition drives selection for  
.037 the capsule virulence determinant of *Streptococcus pneumoniae*. *Curr Biol CB.* 2010 Jul  
.038 13;20(13):1222–6.
- .039 89. Bergmann S, Hammerschmidt S. Versatility of pneumococcal surface proteins.  
.040 *Microbiology.* 2006 Feb 1;152(2):295–303.
- .041 90. Paterson GK, Orihuela CJ. Pneumococcal microbial surface components recognizing  
.042 adhesive matrix molecules targeting of the extracellular matrix. *Mol Microbiol.* 2010 Jul  
.043 1;77(1):1–5.
- .044 91. Jensch I, Gámez G, Rothe M, Ebert S, Fulde M, Somplatzki D, et al. PavB is a surface-  
.045 exposed adhesin of *Streptococcus pneumoniae* contributing to nasopharyngeal  
.046 colonization and airways infections. *Mol Microbiol.* 2010 Jul 1;77(1):22–43.

- .047 92. Kanwal S, Jensch I, Palm GJ, Brönstrup M, Rohde M, Kohler TP, et al. Mapping the  
.048 recognition domains of pneumococcal fibronectin-binding proteins PavA and PavB  
.049 demonstrates a common pattern of molecular interactions with fibronectin type III  
.050 repeats. *Mol Microbiol*. 2017 Sep;105(6):839–59.
- .051 93. Pracht D, Elm C, Gerber J, Bergmann S, Rohde M, Seiler M, et al. PavA of  
.052 *Streptococcus pneumoniae* modulates adherence, invasion, and meningeal  
.053 inflammation. *Infect Immun*. 2005 May;73(5):2680–9.
- .054 94. Antikainen J, Kuparinen V, Lähteenmäki K, Korhonen TK. Enolases from Gram-positive  
.055 bacterial pathogens and commensal lactobacilli share functional similarity in virulence-  
.056 associated traits. *FEMS Immunol Med Microbiol*. 2007 Dec;51(3):526–34.
- .057 95. Bergmann S, Rohde M, Chhatwal GS, Hammerschmidt S. alpha-Enolase of  
.058 *Streptococcus pneumoniae* is a plasmin(ogen)-binding protein displayed on the bacterial  
.059 cell surface. *Mol Microbiol*. 2001 Jun;40(6):1273–87.
- .060 96. Papasergi S, Garibaldi M, Tuscano G, Signorino G, Ricci S, Peppoloni S, et al.  
.061 Plasminogen- and fibronectin-binding protein B is involved in the adherence of  
.062 *Streptococcus pneumoniae* to human epithelial cells. *J Biol Chem*. 2010 Mar  
.063 5;285(10):7517–24.
- .064 97. Yamaguchi M, Terao Y, Mori Y, Hamada S, Kawabata S. PfbA, a novel plasmin- and  
.065 fibronectin-binding protein of *Streptococcus pneumoniae*, contributes to fibronectin-  
.066 dependent adhesion and antiphagocytosis. *J Biol Chem*. 2008 Dec 26;283(52):36272–9.
- .067 98. Voss S, Hallström T, Saleh M, Burchhardt G, Pribyl T, Singh B, et al. The choline-binding  
.068 protein PspC of *Streptococcus pneumoniae* interacts with the C-terminal heparin-binding  
.069 domain of vitronectin. *J Biol Chem*. 2013 May 31;288(22):15614–27.
- .070 99. Shivshankar P, Sanchez C, Rose LF, Orihuela CJ. The *Streptococcus pneumoniae*  
.071 adhesin PsrP binds to Keratin 10 on lung cells. *Mol Microbiol*. 2009 Aug;73(4):663–79.
- .072 100. King SJ, Hippe KR, Weiser JN. Deglycosylation of human glycoconjugates by the  
.073 sequential activities of exoglycosidases expressed by *Streptococcus pneumoniae*. *Mol*  
.074 *Microbiol*. 2006 Feb;59(3):961–74.
- .075 101. Limoli DH, Sladek JA, Fuller LA, Singh AK, King SJ. BgaA acts as an adhesin to mediate  
.076 attachment of some pneumococcal strains to human epithelial cells. *Microbiol Read*  
.077 *Engl*. 2011 Aug;157(Pt 8):2369–81.
- .078 102. Singh AK, Pluvinage B, Higgins MA, Dalia AB, Woodiga SA, Flynn M, et al. Unravelling  
.079 the multiple functions of the architecturally intricate *Streptococcus pneumoniae*  $\beta$ -  
.080 galactosidase, BgaA. *PLoS Pathog*. 2014 Sep;10(9):e1004364.
- .081 103. Warner JB, Lolkema JS. CcpA-dependent carbon catabolite repression in bacteria.  
.082 *Microbiol Mol Biol Rev MMBR*. 2003 Dec;67(4):475–90.
- .083 104. Carvalho SM, Kloosterman TG, Kuipers OP, Neves AR. CcpA Ensures Optimal  
.084 Metabolic Fitness of *Streptococcus pneumoniae*. *PLoS ONE*. 2011 Oct 21;6(10):e26707.

- .085 105. Corradetti B, Taraballi F, Martinez JO, Minardi S, Basu N, Bauza G, et al. Hyaluronic  
.086 acid coatings as a simple and efficient approach to improve MSC homing toward the site  
.087 of inflammation. *Sci Rep*. 2017 11;7(1):7991.
- .088 106. Khademhosseini A, Suh KY, Yang JM, Eng G, Yeh J, Levenberg S, et al. Layer-by-layer  
.089 deposition of hyaluronic acid and poly-L-lysine for patterned cell co-cultures.  
.090 *Biomaterials*. 2004 Aug;25(17):3583–92.
- .091 107. Aoki K, Matsumoto S, Hirayama Y, Wada T, Ozeki Y, Niki M, et al. Extracellular  
.092 mycobacterial DNA-binding protein 1 participates in mycobacterium-lung epithelial cell  
.093 interaction through hyaluronic acid. *J Biol Chem*. 2004 Sep 17;279(38):39798–806.
- .094 108. Aaberge IS, Eng J, Lermark G, Løvik M. Virulence of *Streptococcus pneumoniae* in mice:  
.095 a standardized method for preparation and frozen storage of the experimental bacterial  
.096 inoculum. *Microb Pathog*. 1995 Feb;18(2):141–52.
- .097 109. Huang H. Design and Characterization of Artificial Transcriptional Terminators.  
.098 Massachusetts Institute of Technology; 2008.
- .099 110. Kadam A, Janto B, Eutsey R, Earl JP, Powell E, Dahlgren ME, et al. *Streptococcus*  
.100 *pneumoniae* Supragenome Hybridization Arrays for Profiling of Genetic Content and  
.101 Gene Expression. *Curr Protoc Microbiol*. 2015;36:9D.4.1-9D.4.20.
- .102 111. Kayala MA, Baldi P. Cyber-T web server: differential analysis of high-throughput data.  
.103 *Nucleic Acids Res*. 2012 Jul;40(Web Server issue):W553-559.
- .104 112. Horta CCR, Magalhães B de F, Oliveira-Mendes BBR, do Carmo AO, Duarte CG,  
.105 Felicori LF, et al. Molecular, Immunological, and Biological Characterization of *Tityus*  
.106 *serrulatus* Venom Hyaluronidase: New Insights into Its Role in Envenomation. *PLoS*  
.107 *Negl Trop Dis* [Internet]. 2014 Feb 13 [cited 2019 Sep 20];8(2). Available from:  
.108 <https://www.ncbi.nlm.nih.gov/pmc/articles/PMC3923731/>

.109

.110

.111

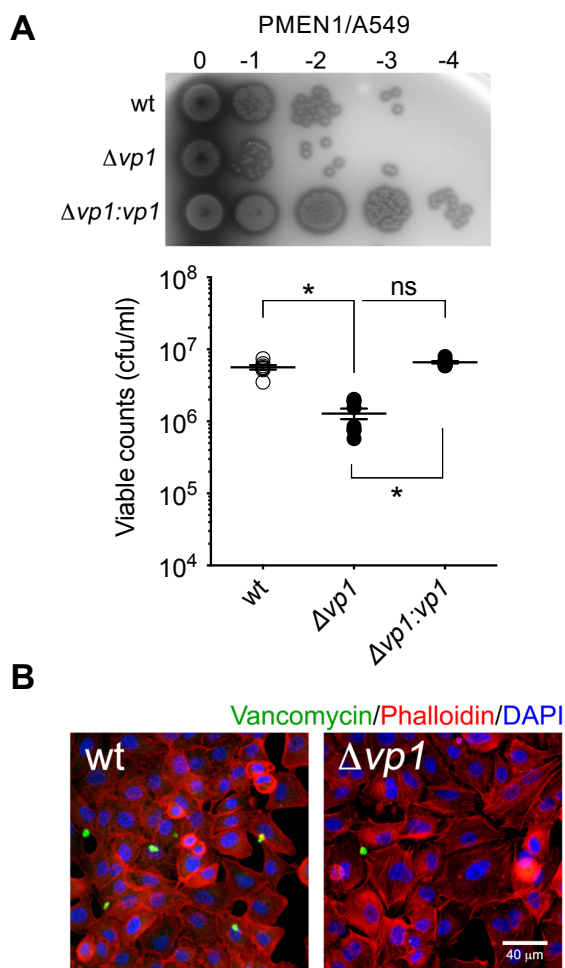

**Fig 1.** *vp1* enhances pneumococcal attachment to epithelial cells.



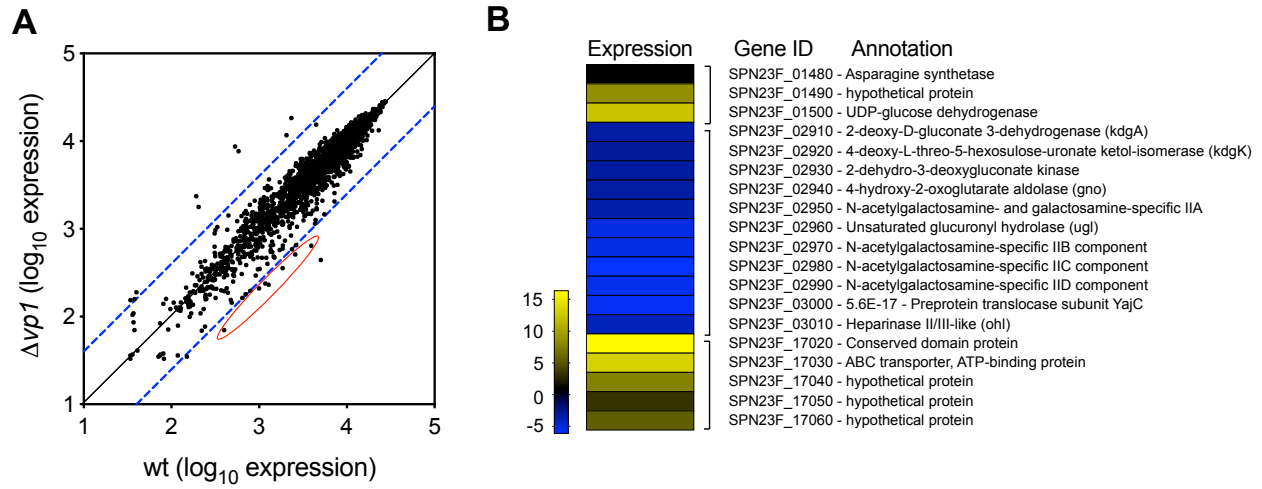

**Fig 2.** The *vp1* product positively regulates the expression of an operon critical to processing of hyaluronic acid.

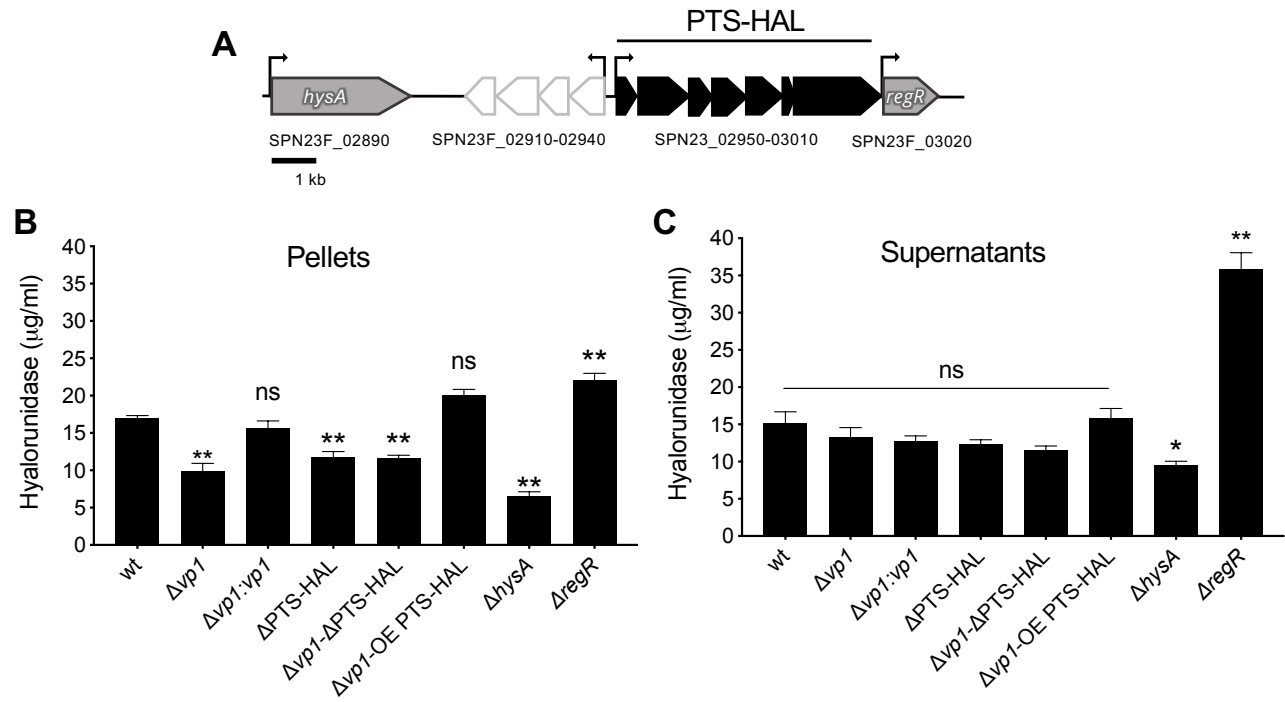

**Fig 3.** The *vp1* product promotes degradation of the hyaluronan polymer via its controls of the operon encoding the PTS-EII system.

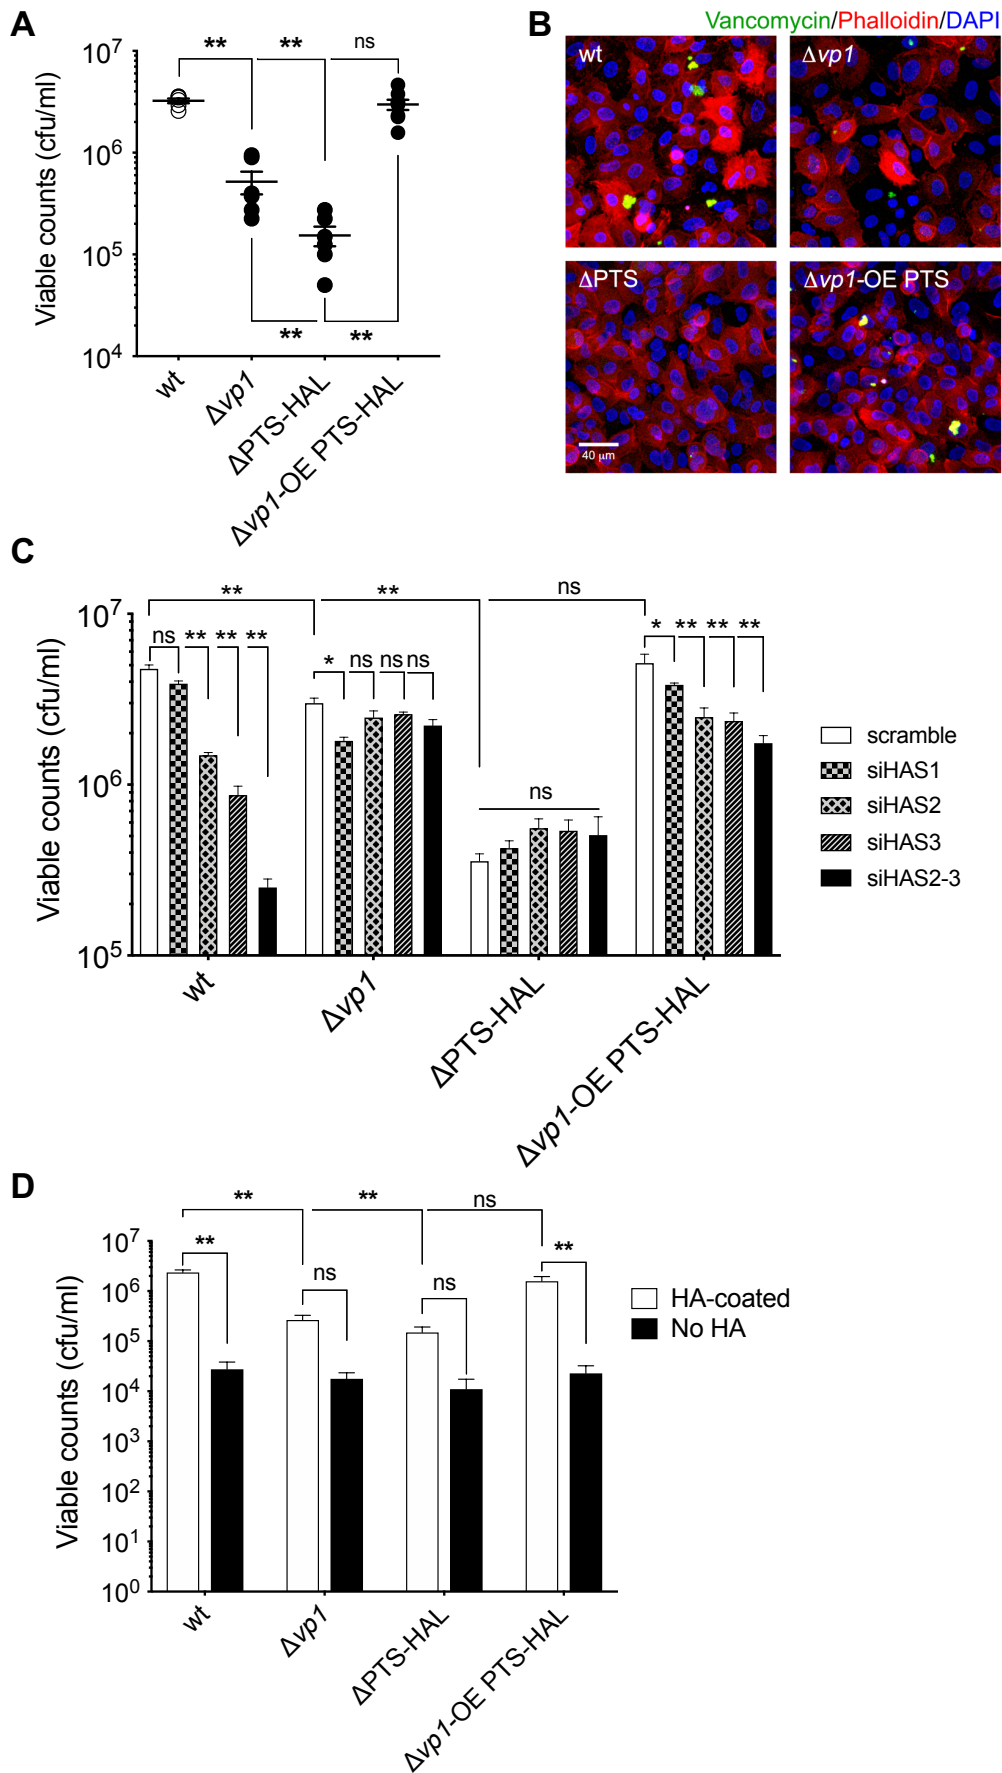

**Fig 4.** Pneumococcus attaches to host HA in a process controlled by VP1 and mediated by molecules involved in HA processing.

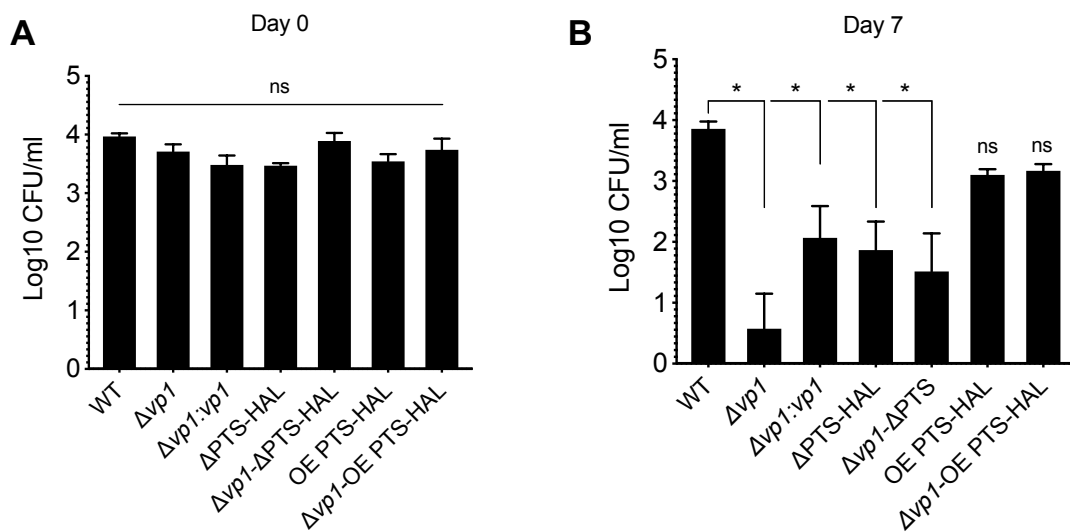

**Fig 5.** HA processing region is required for pneumococcal colonization.

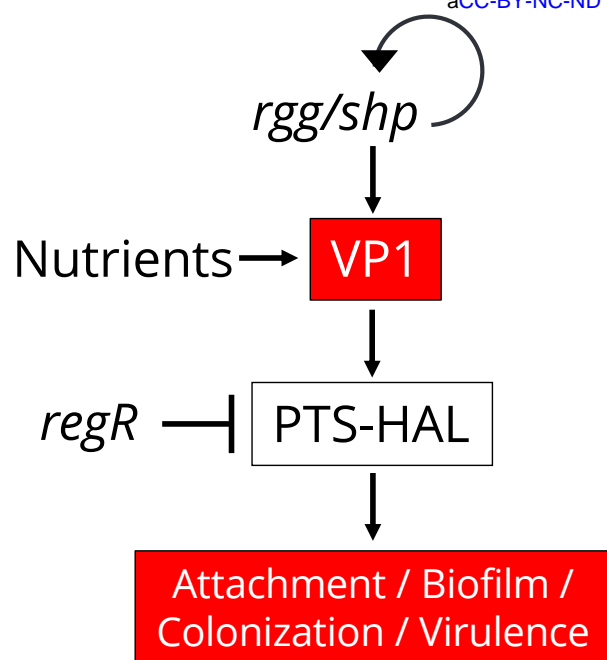

**Fig 6.** Working model for VP1 regulation and its role in cell-cell communication in *Streptococcus pneumoniae*.

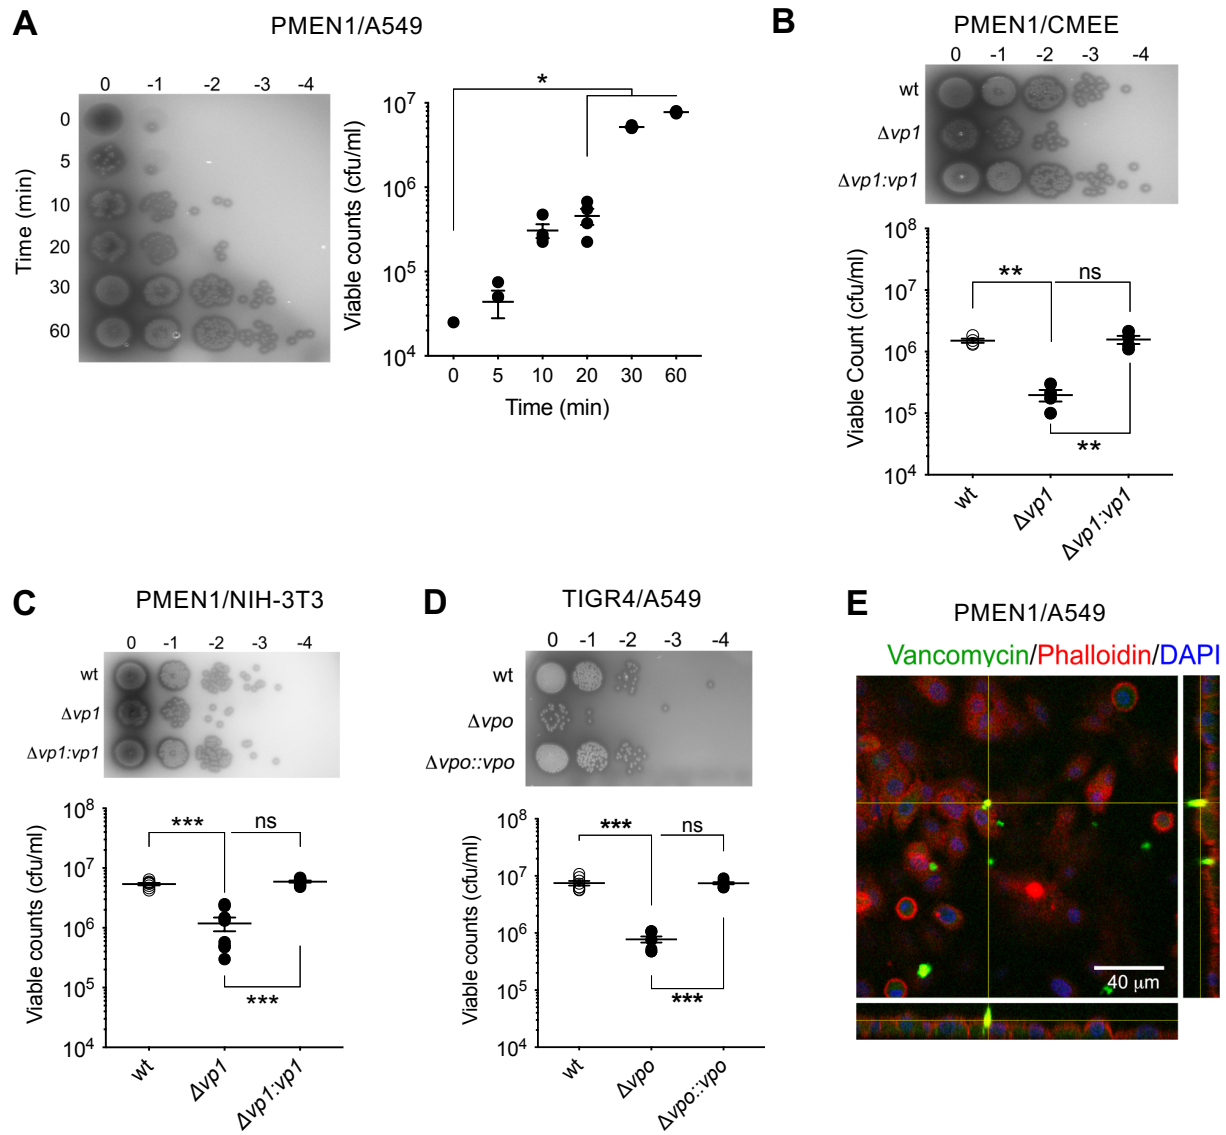

**Fig S1.** *vp1* enhances pneumococcal attachment to epithelial cells.

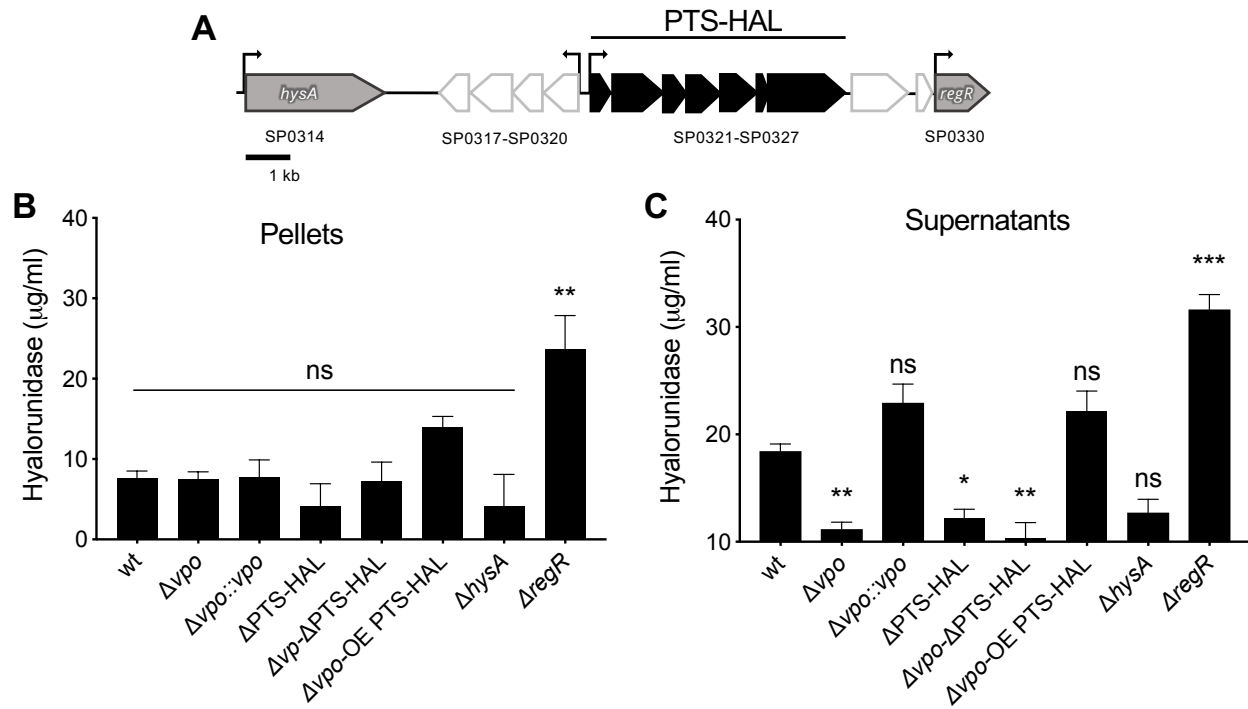

**Fig S2.** The *vp1* product promotes degradation of the hyaluronan polymer via its controls of the operon encoding the PTS-EII system in TIGR4.

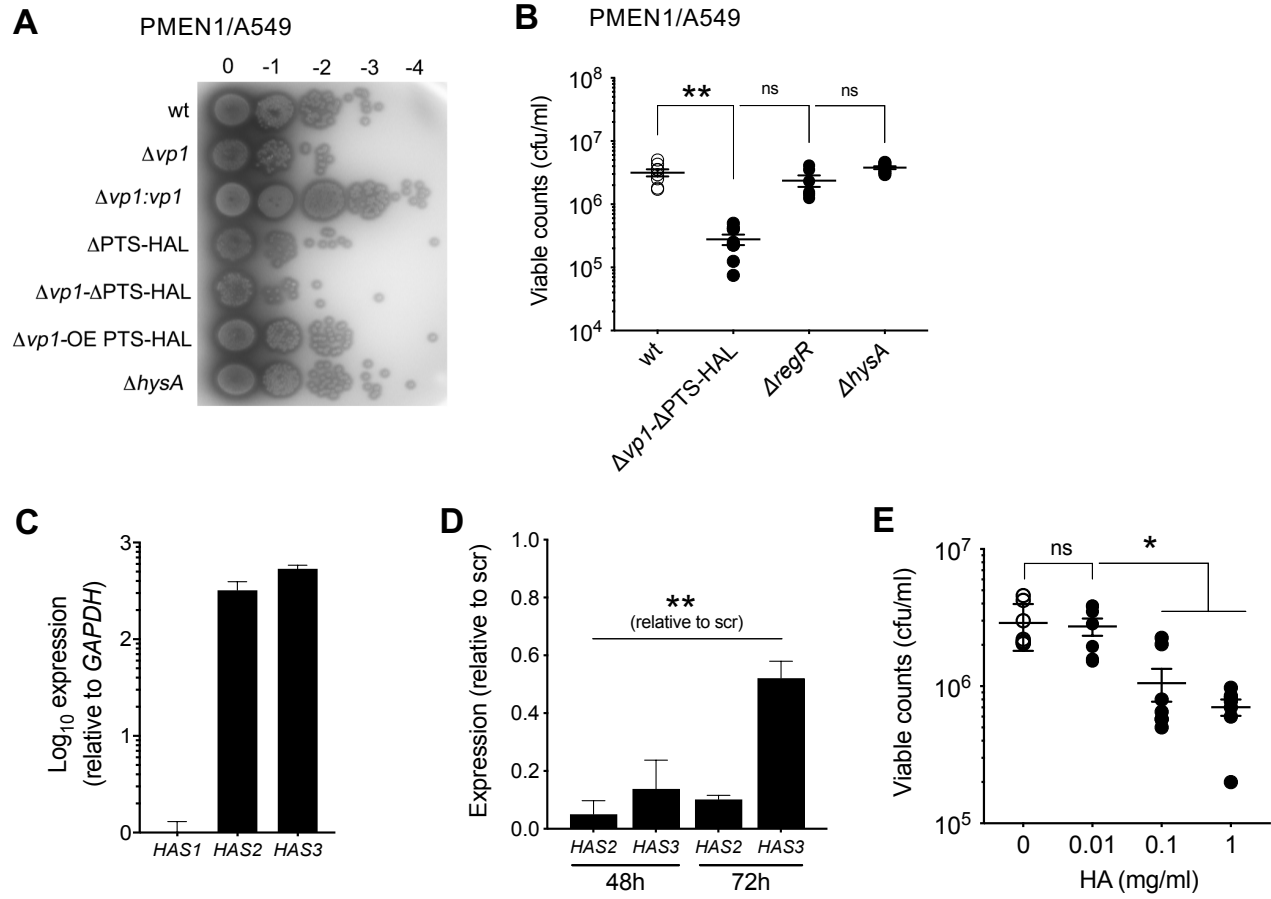

**Fig S3.** Pneumococcus attaches to host HA in a process controlled by VP1 and mediated by molecules involved in hyaluronic acid processing.



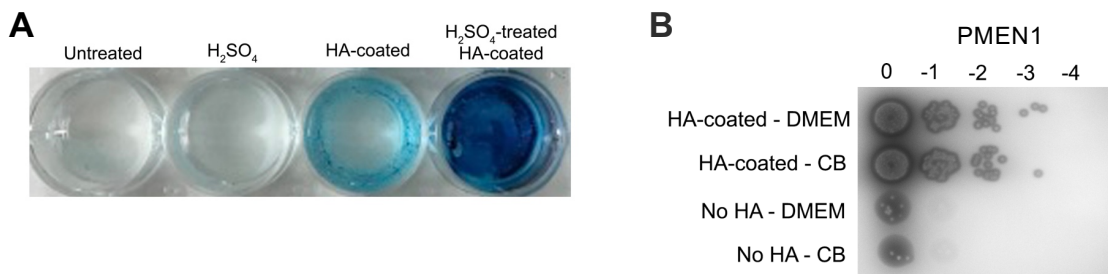

**Fig S4.** *vp1* mediates attachment to hyaluronic acid of *Streptococcus equis* via genes in the PTS-HAL operon.
